# Supplementary material for: Does a healthy lifestyle behaviour influence the prognosis of low back pain among men and women in a general population? A population-based cohort study
Source: PubMed Central journal article supplement — BMJ Open. 2014 Dec 30;4(12):e005713. doi: 10.1136/bmjopen-2014-005713 (PMC4281558; doi:10.1136/bmjopen-2014-005713), 2014-12-30
Supplement: bmjopen-2014-005713.draft_revisions.pdf [file bmjopen-2014-005713.draft_revisions.pdf]

# BMJ Open

## Healthy lifestyle behaviour improves the prognosis of low back pain in women: A population based cohort study

|                                 |                                                                                                                                                                                                                                                                                                                                                                                                                                                                                                                           |
|---------------------------------|---------------------------------------------------------------------------------------------------------------------------------------------------------------------------------------------------------------------------------------------------------------------------------------------------------------------------------------------------------------------------------------------------------------------------------------------------------------------------------------------------------------------------|
| Journal:                        | <i>BMJ Open</i>                                                                                                                                                                                                                                                                                                                                                                                                                                                                                                           |
| Manuscript ID:                  | bmjopen-2014-005713                                                                                                                                                                                                                                                                                                                                                                                                                                                                                                       |
| Article Type:                   | Research                                                                                                                                                                                                                                                                                                                                                                                                                                                                                                                  |
| Date Submitted by the Author:   | 16-May-2014                                                                                                                                                                                                                                                                                                                                                                                                                                                                                                               |
| Complete List of Authors:       | Bohman, Tony; Karolinska Institutet, Institute of Environmental Medicine Alfredsson, Lars; Karolinska Institutet, Institute of Environmental Medicine Jensen, Irene; Karolinska Institutet, Institute of Environmental Medicine Hallqvist, Johan; Uppsala University, Department of Public Health and Caring Sciences<br>Vingard, Eva; Uppsala University, Department of Medical Science Skillgate, Eva; Karolinska Institutet, Institute of Environmental Medicine; Scandinavian College of Naprapathic Manual Medicine, |
| <b>Primary Subject Heading</b>: | Epidemiology                                                                                                                                                                                                                                                                                                                                                                                                                                                                                                              |
| Secondary Subject Heading:      | Public health                                                                                                                                                                                                                                                                                                                                                                                                                                                                                                             |
| Keywords:                       | Back pain < ORTHOPAEDIC & TRAUMA SURGERY, Public health < INFECTIOUS DISEASES, Epidemiology < TROPICAL MEDICINE                                                                                                                                                                                                                                                                                                                                                                                                           |
|                                 |                                                                                                                                                                                                                                                                                                                                                                                                                                                                                                                           |

SCHOLARONE™  
Manuscripts

1  
2  
3  
4  
5 **Healthy lifestyle behaviour improves the prognosis of low back pain in**  
6  
7  
8 **women: A population based cohort study.**  
9

10 Tony Bohman, PhD,<sup>1</sup> Lars Alfredsson, professor,<sup>1,2</sup> Irene Jensen, professor,<sup>1</sup> Johan Hallqvist,  
11 professor,<sup>3,4</sup> Eva Vingård, professor,<sup>5</sup> Eva Skillgate, principal,<sup>1,6</sup>  
12  
13

14 <sup>1</sup> Institute of Environmental Medicine, Karolinska Institutet, Box 210, SE-17177 Stockholm, Sweden,  
15

16 <sup>2</sup> Centre for Occupational and Environmental Medicine, Stockholm County Council, Norrbacka, SE-  
17

18 171 76 Stockholm, Sweden, <sup>3</sup> Department of Public Health Sciences, Karolinska  
19

20 Universitetssjukhuset, SE-17176 Stockholm, Sweden, <sup>4</sup> Department of Public Health and Caring  
21

22 Sciences, Uppsala University, Box 564, SE-75122 Uppsala, Sweden, <sup>5</sup> Department of Medical  
23

24 Science, Uppsala University, SE-75185 Uppsala, Sweden, <sup>6</sup> Scandinavian College of Naprapathic  
25

26 Manual Medicine, Kräffrieket 23A, SE-11419 Stockholm, Sweden  
27  
28  
29

30 Corresponding author:  
31

32 Tony Bohman, Institute of Environmental Medicine, Karolinska Institutet, Box 210, SE-17177  
33

34 Stockholm, Sweden  
35

36 e-mail; tony.bohman@ki.se, cellphone; +46 70 299 62 63  
37  
38

39 Key words: back pain, epidemiology, life style, cohort studies, public health  
40

41 Word count: 3247  
42

43 Figures: 3  
44

45 Tables: 2  
46

47 References: 41  
48

49 Supplementary files: 1  
50  
51  
52  
53  
54  
55  
56  
57  
58  
59  
60

## Abstract

### Objectives

To study the influence of healthy lifestyle behaviour on the prognosis of occasional low back pain among men and women in a general population.

### Design

Cohort study with a four year follow-up.

### Settings

General population in Stockholm County, Sweden.

### Participants

The study sample comprised 3938 men and 5056 women, aged 18-84, from the Stockholm Public Health cohort reporting occasional low back pain in the baseline questionnaire 2006.

### Measures

Lifestyle factors and potential confounders were assessed at baseline. The lifestyle factors smoking habits, alcohol consumption, leisure physical activity and consumption of fruit and vegetables, were dichotomized using recommendations for a health-enhancing lifestyle and combined to form the exposure variable “healthy lifestyle behaviour”. The exposure was categorised into five levels according to the number of healthy lifestyle factors met. The follow-up questionnaire in 2010 gave information about the outcome, long duration troublesome low back pain. Crude and adjusted binomial regression models were applied to estimate the association between the exposure and the outcome analysing men and women separately.

### Results

The risk of developing long duration troublesome low back pain among women with occasional low back pain decreased with increasing healthy lifestyle behaviour (test for trend:  $p=0.006$ ). 21% (28/131) among women with no healthy lifestyle factor (reference group) experienced the outcome

1  
2  
3 compared to nine percent (36/420) among women with all four factors. Compared to the reference  
4  
5 group, the risk was reduced by 35% (RR: 0.65, 95% CI: 0.44 to 0.96) for women with one healthy  
6  
7 lifestyle factor and 52% (RR: 0.48, 95% CI: 0.31 to 0.77) for women with all four healthy lifestyle  
8  
9 factors. There were no clear associations found among men.

## 10 11 12 **Conclusion**

13  
14 Healthy lifestyle behaviour decreases the risk of developing long duration troublesome low back pain  
15  
16 among women with occasional low back pain and may be recommended to improve the prognosis.  
17  
18

## 19 20 **Article summary**

### 21 22 **Strengths and limitations of this study**

- 23  
24  
25  
26  
27  
28  
29  
30  
31  
32  
33  
34  
35  
36  
37  
38  
39  
40  
41  
42  
43  
44  
45  
46  
47  
48  
49  
50  
51  
52  
53  
54  
55  
56  
57  
58  
59  
60  
61  
62  
63  
64  
65  
66  
67  
68  
69  
70  
71  
72  
73  
74  
75  
76  
77  
78  
79  
80  
81  
82  
83  
84  
85  
86  
87  
88  
89  
90  
91  
92  
93  
94  
95  
96  
97  
98  
99  
100  
101  
102  
103  
104  
105  
106  
107  
108  
109  
110  
111  
112  
113  
114  
115  
116  
117  
118  
119  
120  
121  
122  
123  
124  
125  
126  
127  
128  
129  
130  
131  
132  
133  
134  
135  
136  
137  
138  
139  
140  
141  
142  
143  
144  
145  
146  
147  
148  
149  
150  
151  
152  
153  
154  
155  
156  
157  
158  
159  
160  
161  
162  
163  
164  
165  
166  
167  
168  
169  
170  
171  
172  
173  
174  
175  
176  
177  
178  
179  
180  
181  
182  
183  
184  
185  
186  
187  
188  
189  
190  
191  
192  
193  
194  
195  
196  
197  
198  
199  
200  
201  
202  
203  
204  
205  
206  
207  
208  
209  
210  
211  
212  
213  
214  
215  
216  
217  
218  
219  
220  
221  
222  
223  
224  
225  
226  
227  
228  
229  
230  
231  
232  
233  
234  
235  
236  
237  
238  
239  
240  
241  
242  
243  
244  
245  
246  
247  
248  
249  
250  
251  
252  
253  
254  
255  
256  
257  
258  
259  
260  
261  
262  
263  
264  
265  
266  
267  
268  
269  
270  
271  
272  
273  
274  
275  
276  
277  
278  
279  
280  
281  
282  
283  
284  
285  
286  
287  
288  
289  
290  
291  
292  
293  
294  
295  
296  
297  
298  
299  
300  
301  
302  
303  
304  
305  
306  
307  
308  
309  
310  
311  
312  
313  
314  
315  
316  
317  
318  
319  
320  
321  
322  
323  
324  
325  
326  
327  
328  
329  
330  
331  
332  
333  
334  
335  
336  
337  
338  
339  
340  
341  
342  
343  
344  
345  
346  
347  
348  
349  
350  
351  
352  
353  
354  
355  
356  
357  
358  
359  
360  
361  
362  
363  
364  
365  
366  
367  
368  
369  
370  
371  
372  
373  
374  
375  
376  
377  
378  
379  
380  
381  
382  
383  
384  
385  
386  
387  
388  
389  
390  
391  
392  
393  
394  
395  
396  
397  
398  
399  
400  
401  
402  
403  
404  
405  
406  
407  
408  
409  
410  
411  
412  
413  
414  
415  
416  
417  
418  
419  
420  
421  
422  
423  
424  
425  
426  
427  
428  
429  
430  
431  
432  
433  
434  
435  
436  
437  
438  
439  
440  
441  
442  
443  
444  
445  
446  
447  
448  
449  
450  
451  
452  
453  
454  
455  
456  
457  
458  
459  
460  
461  
462  
463  
464  
465  
466  
467  
468  
469  
470  
471  
472  
473  
474  
475  
476  
477  
478  
479  
480  
481  
482  
483  
484  
485  
486  
487  
488  
489  
490  
491  
492  
493  
494  
495  
496  
497  
498  
499  
500  
501  
502  
503  
504  
505  
506  
507  
508  
509  
510  
511  
512  
513  
514  
515  
516  
517  
518  
519  
520  
521  
522  
523  
524  
525  
526  
527  
528  
529  
530  
531  
532  
533  
534  
535  
536  
537  
538  
539  
540  
541  
542  
543  
544  
545  
546  
547  
548  
549  
550  
551  
552  
553  
554  
555  
556  
557  
558  
559  
560  
561  
562  
563  
564  
565  
566  
567  
568  
569  
570  
571  
572  
573  
574  
575  
576  
577  
578  
579  
580  
581  
582  
583  
584  
585  
586  
587  
588  
589  
590  
591  
592  
593  
594  
595  
596  
597  
598  
599  
600  
601  
602  
603  
604  
605  
606  
607  
608  
609  
610  
611  
612  
613  
614  
615  
616  
617  
618  
619  
620  
621  
622  
623  
624  
625  
626  
627  
628  
629  
630  
631  
632  
633  
634  
635  
636  
637  
638  
639  
640  
641  
642  
643  
644  
645  
646  
647  
648  
649  
650  
651  
652  
653  
654  
655  
656  
657  
658  
659  
660  
661  
662  
663  
664  
665  
666  
667  
668  
669  
670  
671  
672  
673  
674  
675  
676  
677  
678  
679  
680  
681  
682  
683  
684  
685  
686  
687  
688  
689  
690  
691  
692  
693  
694  
695  
696  
697  
698  
699  
700  
701  
702  
703  
704  
705  
706  
707  
708  
709  
710  
711  
712  
713  
714  
715  
716  
717  
718  
719  
720  
721  
722  
723  
724  
725  
726  
727  
728  
729  
730  
731  
732  
733  
734  
735  
736  
737  
738  
739  
740  
741  
742  
743  
744  
745  
746  
747  
748  
749  
750  
751  
752  
753  
754  
755  
756  
757  
758  
759  
760  
761  
762  
763  
764  
765  
766  
767  
768  
769  
770  
771  
772  
773  
774  
775  
776  
777  
778  
779  
780  
781  
782  
783  
784  
785  
786  
787  
788  
789  
790  
791  
792  
793  
794  
795  
796  
797  
798  
799  
800  
801  
802  
803  
804  
805  
806  
807  
808  
809  
810  
811  
812  
813  
814  
815  
816  
817  
818  
819  
820  
821  
822  
823  
824  
825  
826  
827  
828  
829  
830  
831  
832  
833  
834  
835  
836  
837  
838  
839  
840  
841  
842  
843  
844  
845  
846  
847  
848  
849  
850  
851  
852  
853  
854  
855  
856  
857  
858  
859  
860  
861  
862  
863  
864  
865  
866  
867  
868  
869  
870  
871  
872  
873  
874  
875  
876  
877  
878  
879  
880  
881  
882  
883  
884  
885  
886  
887  
888  
889  
890  
891  
892  
893  
894  
895  
896  
897  
898  
899  
900  
901  
902  
903  
904  
905  
906  
907  
908  
909  
910  
911  
912  
913  
914  
915  
916  
917  
918  
919  
920  
921  
922  
923  
924  
925  
926  
927  
928  
929  
930  
931  
932  
933  
934  
935  
936  
937  
938  
939  
940  
941  
942  
943  
944  
945  
946  
947  
948  
949  
950  
951  
952  
953  
954  
955  
956  
957  
958  
959  
960  
961  
962  
963  
964  
965  
966  
967  
968  
969  
970  
971  
972  
973  
974  
975  
976  
977  
978  
979  
980  
981  
982  
983  
984  
985  
986  
987  
988  
989  
990  
991  
992  
993  
994  
995  
996  
997  
998  
999  
1000
- Strengths of this study are the large sample, the longitudinal design, the long term follow-up, robust analyses and the large number of potential confounding factors assessed.
- Possible limitations of this study were the potential risk of misclassification of the exposure variable and the relatively large loss to follow-up, although these limitations most probably lead to an underestimation of the associations studied. Further the results may have been affected by questionnaire items not fully validated.

## Introduction

Lifestyle factors such as non-smoking, physical activity, healthy diet and moderate alcohol use seem to influence the risk and the prognosis in several diseases (e.g. cancer, type 2 diabetes mellitus, and cardiovascular disease) as well as mortality, especially when the factors are combined.[1-5]

Low back pain (LBP) is one of the most common health problems worldwide and comprises a large burden on individuals as well as on society.[6, 7] When estimating the global prevalence of activity-limiting LBP using 165 studies from 54 countries, Hoy and colleagues found the mean point- and 1 month prevalence to be  $11.9 \pm 2.0\%$  and  $23.2 \pm 2.9\%$  respectively.[6] Current knowledge of prognostic factors, e.g. lifestyle factors, for LBP is limited and the above mentioned facts support the need for more research on this topic.

In a “review of reviews” from 2009, Hayden and colleagues reported older age, negative cognitive characteristics, poor general health, increased psychological or psychosocial stress, poor relations with colleagues, physically heavy work, functional disability, sciatica, and the presence of worker’s compensation to be associated with poor outcomes of acute and sub-acute LBP.[8] Another 2009 review found recovery expectations to be associated with activity limitations or participation restrictions (e.g. return to work) in persons with non-chronic non-specific LBP.[9] In the review by Hayden and colleagues smoking was the only lifestyle factor included and found, by two studies, to have no association with poor outcomes of acute and sub-acute LBP.[8] Similarly, a recent review studying prognostic factors for recovery from chronic LBP found no association between smoking and the outcome pain and disability.[10] Moreover, reviewing observational studies on LBP patients Hendrick and colleagues found moderate evidence for sports, leisure and occupational physical activity not to be associated with LBP outcomes.[11]

Women seem to have higher prevalence, be more severely affected and have worse prognosis of LBP than men and some studies suggest that men and women should be assessed separately when studying risk and prognostic factors for LBP.[6, 12-14]

To our knowledge, it is not known if healthy lifestyle behavior, defined by a combination of lifestyle factors, is associated with the prognosis of LBP. Healthy lifestyle behaviour seems to have a larger

1  
2  
3 potential to affect health problems and mortality than separate lifestyle factors alone.[1-5] We  
4  
5 hypothesized that healthy lifestyle behaviour would decrease the risk of a poor outcome among men  
6  
7 and women with occasional low back pain. If healthy lifestyle behaviour affects the prognosis of LBP  
8  
9 implementing this knowledge could potentially prevent transition into disabling LBP and thereby  
10  
11 reduce the burden on the individual as well as on the society.

12  
13 The aim of this study was to explore the influence of healthy lifestyle behaviour on the prognosis of  
14  
15 occasional low back pain among men and women in a general population, hypothesizing that healthy  
16  
17 lifestyle behaviour can improve the prognosis.  
18  
19

## 20 21 **Methods**

### 22 23 **Study design and source population**

24  
25 In this study we used data from the Stockholm Public Health Cohort (SPHC).[15] The SPHC was set  
26  
27 up by the Stockholm County Council and administered by Statistics Sweden and the Department of  
28  
29 Public Health Sciences at Karolinska Institutet, Stockholm. The SPHC is a population based cohort  
30  
31 established within the framework of Stockholm County Council public health surveys. In 2006,  
32  
33 Stockholm County had an adult population of approximately 1.4 million individuals. From this  
34  
35 population a total of 56 634 individuals (18-84 years old) were randomly selected, after stratification  
36  
37 for gender and residential area, and received the baseline questionnaire, which 34 707 (61%)  
38  
39 answered. The responders received a follow-up questionnaire in 2010, answered by 25 167  
40  
41 participants (73%). Compared to consensus data from Stockholm County the SPHC participants were  
42  
43 more likely to be of female gender, be born in Sweden, have higher education and income and be more  
44  
45 than 45 years old.[15]  
46  
47  
48

### 49 50 **Study sample**

51  
52 The study sample (n=8994) consisted of participants reporting occasional LBP at baseline in 2006 who  
53  
54 answered the follow-up questionnaire in 2010 and provided complete information on outcome and  
55  
56 exposure variables (Figure 1). Occasional LBP at baseline was defined as reporting having had LBP,  
57  
58  
59  
60

1  
2  
3 on average, up to a couple of days per month during the past 6 months. The information was based on  
4  
5 a modified version of a question from the Standardized Nordic Questionnaire.[16]  
6  
7

## 8 **Data collection and variables**

9  
10 The baseline and the follow-up questionnaires comprised self-reported information on lifestyle,  
11  
12 demographic- and socioeconomic characteristics, physical and psychological health and work related  
13  
14 factors. The self-reported data were supplemented with information from regional and national  
15  
16 registers.[15] Four reminders were sent after the baseline questionnaire and three reminders after the  
17  
18 follow-up questionnaire.  
19

### 20 21 Exposure: healthy lifestyle behaviour (HLB)

22  
23 Using baseline information we constructed four binary healthy lifestyle factors where cut-offs  
24  
25 (healthy/not healthy) were set in accordance with recommendations for a health-enhancing lifestyle  
26  
27 made by Swedish authorities and WHO.[17-20] The exposure variable “healthy lifestyle behaviour”  
28  
29 (HLB) was a combination of these binary factors and was categorised into five levels according to the  
30  
31 number of healthy lifestyle factors included, i.e. from none to four (HLB0 to HLB4). A healthy  
32  
33 lifestyle behaviour with regard to each of the considered healthy factors was defined by: non-smoking,  
34  
35 no risk consumption of alcohol ( $\leq 168$  g 100% alcohol/week for men and  $\leq 108$  g 100% alcohol/week  
36  
37 for women, and consuming alcohol corresponding to about half a bottle of spirits (35 cl) on the same  
38  
39 occasion less than once a month), recommended level of leisure physical activity (at least 150 minutes  
40  
41 at moderate intensity or 75 minutes at high intensity per week or a combination of these activities),  
42  
43 and recommended consumption of fruit and vegetables ( $\geq$  a total of 4 servings of fruit and  
44  
45 vegetables/day, equal to about 400 g/day) (see the Appendix for a description of the questions and  
46  
47 how the variables were constructed).  
48  
49

### 50 Outcome variable: long duration troublesome low back pain (LTLBP)

51  
52 Information on the outcome LTLBP was collected from the follow-up questionnaire in 2010 and  
53  
54 defined as having had LBP that decreased workability or interfered with other daily activities to some  
55  
56 or to high degree, on average a couple of days per week or more often during the past 6 months. The  
57  
58  
59  
60

1  
2  
3 question used to measure LTLBP was modified from the Standardized Nordic Questionnaire and  
4 incorporated a dimension of disability suggested to be of importance when defining LBP.[16, 21]  
5  
6

### 7 8 Potential confounding factors

9  
10 Potential confounders were chosen based on theoretic and empirical relevance, information from  
11 literature regarding the prognosis of spinal pain and availability in the questionnaire.[8, 22, 23] The  
12 following factors were considered: long-term illness (suffering from long-term illness, health problems  
13 following an accident, disability or other persistent health problems), neck pain and pain from hip,  
14 thigh or knee during the past 6 months (5 answer alternatives from “no pain” to “daily pain”),  
15 suffering from headache or migraine (“no”, “somewhat”, “severe”), rheumatoid arthritis diagnosed by  
16 a physician, living alone, living with children (children of all ages included) and hours of sleep a  
17 typical night during the workweek (dichotomized into “good sleep”: 6-8 h and “poor sleep”: <6 h or  
18 >8 h). The questionnaire also included the 12-item General Health Questionnaire were a sum score of  
19  $\geq 3$  (using the recommended 0-0-1-1 scoring on the four answer alternatives) was used to assess  
20 psychological distress.[24, 25] The frequency of stress was measured by the question “How often do  
21 you feel stress?” with 5 answer alternatives from “never” to “most of the week”. Personal support  
22 (having persons who can give support in handling personal problems or critical life events) was  
23 measured using a question from the Social Support-13 instrument (SS-13).[26] Furthermore, financial  
24 stress was assessed by the question “Did it during the previous 12 months happen that you ran out of  
25 money and had to borrow from relatives and friends to be able to pay for food or rent?” (“no”, “yes, on  
26 one occasion”, “yes, on several occasions”). A Swedish national register supplied information on civil  
27 status (married, unmarried, divorced, widow/widower), country of birth (Sweden, Nordic countries  
28 and Europe, outside Europe), socio-economic status (SES), annual individual disposable income  
29 (grouped in quintiles) and education.[27, 28] The level of education was categorized into, low (only  
30 compulsory education and vocational training), intermediate (secondary school) and high (university  
31 studies).  
32  
33  
34  
35  
36  
37  
38  
39  
40  
41  
42  
43  
44  
45  
46  
47  
48  
49  
50  
51  
52  
53  
54

### 55 56 Statistical methods

57  
58  
59  
60



1  
2  
3 We used generalized linear models with a binomial distribution to estimate the association between the  
4 exposure and the outcome analysing men and women separately. To determine the role of a potential  
5 confounding factor we included them, one at a time, into the crude model. Only factors that changed  
6 the estimated risk ratio (RR) by 10% or more were entered into the final model.[29-33] All final  
7 models were adjusted for age categorized into 10 year intervals. Age was categorized as it showed  
8 non-linearity with the outcome. We calculated relative risks (RR), using the log function, as well as  
9 risk differences (RD), using the identity function, with 95% confidence intervals (95% CI). A  
10 likelihood ratio test was used to assess effect measure modification between the exposure and possible  
11 confounders as well as between confounders included in the final models.[34] We used Wald test to  
12 evaluate potential trends in the associations between the exposure and the outcome, and a Chi-square  
13 test to assess if the overall adjusted risk differed between men and women.[34] The effect of attrition  
14 was assessed, using Chi-square tests, by comparing the distribution of the four healthy lifestyle factors  
15 included in the exposure, healthy lifestyle behaviour, in subjects who were lost to follow-up to the  
16 distribution in the study sample.

17  
18  
19 All p-values were two-sided, and analyses were completed using SAS® version 9.3 and STATA/IC®  
20 version 12.1.  
21  
22  
23  
24  
25  
26  
27  
28  
29  
30

## 31 32 33 34 35 36 37 **Results**

### 38 39 40 41 **Baseline characteristics**

42  
43 The study sample (n=8994) consisted of 56% women. Participants were predominately middle aged,  
44 well educated, and born in Sweden. At baseline in 2006, about 15% of the participants were 65 years  
45 or older (men 17% and women 14%). Furthermore the majority were cohabitating, and about 35% had  
46 children living at home (Table 1). About three percent men and 10% women had an “optimal healthy  
47 lifestyle” (HLB4) whereas about five percent men and three percent women had an “unhealthy  
48 lifestyle” (HLB0). Healthy lifestyle behaviour improved with increased level of education.

49  
50  
51  
52  
53  
54  
55  
56  
57  
58  
59  
60  
Participants being married or having children living at home had a high proportion of healthy lifestyle  
behaviour while participants living alone, being psychologically distressed and financially stressed

1  
2  
3  
4  
5  
6  
7  
8  
9  
10  
11  
12  
13  
14  
15  
16  
17  
18  
19  
20  
21  
22  
23  
24  
25  
26  
27  
28  
29  
30  
31  
32  
33  
34  
35  
36  
37  
38  
39  
40  
41  
42  
43  
44  
45  
46  
47  
48  
49  
50  
51  
52  
53  
54  
55  
56  
57  
58  
59  
60

showed low proportions of healthy lifestyle behaviour (Table 1).  
The other baseline variables assessed did not differ much between the categories of HLB, neither among men nor among women.

For peer review only

Table 1. Baseline characteristics by categories of the exposure healthy lifestyle behaviour (HLB0 - HLB4)\* (n = 8994).

| Baseline characteristics       | Men          |              |              |               |              |              | Women        |              |              |               |               |              | Internal drop-out M/W (n) |
|--------------------------------|--------------|--------------|--------------|---------------|--------------|--------------|--------------|--------------|--------------|---------------|---------------|--------------|---------------------------|
|                                | All (n=3938) | HLB0 (n=181) | HLB1 (n=958) | HLB2 (n=1747) | HLB3 (n=936) | HLB4 (n=116) | All (n=5056) | HLB0 (n=174) | HLB1 (n=897) | HLB2 (n=2080) | HLB3 (n=1416) | HLB4 (n=489) |                           |
| Proportion of study sample (%) | 44           |              |              |               |              |              | 56           |              |              |               |               |              |                           |
| Mean age, years (SD)           | 50(15)       | 49(14)       | 48(15)       | 49(15)        | 51(15)       | 50(14)       | 46(16)       | 43(17)       | 47(15)       | 46(16)        | 47(15)        | 46(14)       | 0/0                       |
| <b>Education</b>               |              |              |              |               |              |              |              |              |              |               |               |              | 234/287                   |
| Low                            | 16           | 30           | 19           | 14            | 14           | 8            | 14           | 22           | 17           | 13            | 12            | 9            |                           |
| Intermediate                   | 43           | 43           | 46           | 44            | 40           | 35           | 41           | 57           | 46           | 42            | 38            | 34           |                           |
| High                           | 41           | 27           | 35           | 42            | 46           | 57           | 45           | 21           | 37           | 45            | 50            | 57           |                           |
| <b>Civil status</b>            |              |              |              |               |              |              |              |              |              |               |               |              | 0/1                       |
| Married                        | 54           | 42           | 49           | 56            | 56           | 65           | 47           | 27           | 41           | 46            | 53            | 53           |                           |
| Unmarried                      | 33           | 38           | 36           | 32            | 31           | 29           | 36           | 49           | 37           | 37            | 33            | 32           |                           |
| Divorced/Widow/Widower         | 13           | 20           | 15           | 12            | 13           | 6            | 17           | 24           | 22           | 17            | 14            | 15           |                           |
| <b>SES<sup>a</sup></b>         |              |              |              |               |              |              |              |              |              |               |               |              | 292/398                   |
| Unskilled/semiskilled worker   | 14           | 22           | 17           | 13            | 12           | 9            | 16           | 23           | 19           | 16            | 14            | 10           |                           |
| Skilled worker                 | 15           | 25           | 16           | 14            | 15           | 8            | 10           | 22           | 12           | 9             | 9             | 11           |                           |
| Assistant non-manual employees | 8            | 8            | 10           | 9             | 7            | 5            | 20           | 22           | 21           | 22            | 18            | 15           |                           |
| Intermediate non-manual        | 25           | 14           | 25           | 24            | 27           | 24           | 29           | 23           | 23           | 29            | 31            | 35           |                           |

1  
2  
3  
4  
5  
6  
7  
8  
9  
10  
11  
12  
13  
14  
15  
16  
17  
18  
19  
20  
21  
22  
23  
24  
25  
26  
27  
28  
29  
30  
31  
32  
33  
34  
35  
36  
37  
38  
39  
40  
41  
42  
43  
44  
45  
46  
47  
48  
49

|                                             |    |    |    |    |    |    |    |    |    |    |    |    |       |
|---------------------------------------------|----|----|----|----|----|----|----|----|----|----|----|----|-------|
| employees                                   |    |    |    |    |    |    |    |    |    |    |    |    |       |
| Employed/self-employed                      | 25 | 17 | 18 | 28 | 28 | 34 | 19 | 7  | 17 | 18 | 21 | 24 |       |
| professionals                               |    |    |    |    |    |    |    |    |    |    |    |    |       |
| Self-employed<br>(other than professionals) | 13 | 14 | 14 | 12 | 11 | 20 | 6  | 3  | 8  | 6  | 7  | 5  |       |
| <b>Poor sleep<sup>b</sup></b>               |    |    |    |    |    |    |    |    |    |    |    |    | 34/27 |
| <6 or >8 hours/night                        | 9  | 17 | 9  | 10 | 7  | 9  | 10 | 14 | 11 | 11 | 9  | 7  |       |
| <b>Living alone</b>                         | 17 | 31 | 19 | 16 | 14 | 9  | 19 | 24 | 21 | 19 | 17 | 17 | 10/16 |
| <b>Living with children</b>                 | 34 | 24 | 31 | 35 | 34 | 42 | 38 | 27 | 32 | 39 | 41 | 41 | 10/16 |
| <b>Psychological distress<sup>c</sup></b>   | 13 | 18 | 15 | 13 | 11 | 5  | 21 | 33 | 23 | 22 | 19 | 17 | 38/37 |
| <b>Financial stress<sup>d</sup></b>         | 7  | 15 | 10 | 5  | 4  | 3  | 9  | 23 | 13 | 9  | 7  | 6  | 17/24 |

\* HLB0 = no healthy lifestyle factor, HLB1 = 1 of 4 healthy lifestyle factors, HLB2 = 2 of 4 factors, HLB3 = 3 of 4 factors, HLB4 = all 4 healthy lifestyle factors.

<sup>a</sup> Socio-economic status. For the economically active population SES was based on current occupation and education. For the non-active population SES was based on previous occupation, current education or the occupation of spouses.

<sup>b</sup> Hours of sleep a typical night during the workweek (dichotomized into “good sleep”: 6-8 h and “poor sleep”: <6 h or >8 h).

<sup>c</sup> From the 12-item General Health Questionnaire (GHQ-12) were a sum score  $\geq 3$  was used to asses psychological stress.

<sup>d</sup> Financial stress: Had to borrow money from relatives and friends to be able to pay for food or rent on several occasions during the previous 12 months.

1  
2  
3 The majority of both men and women were non-smokers and did not exceed risk consumption of  
4 alcohol. About 40% of both men and women reached recommended levels of leisure physical activity  
5 while 26% of the women consumed recommended levels of fruit and vegetables compared to seven  
6 percent for men (Figure 2).  
7  
8  
9

## 10 11 **Outcome**

12  
13  
14 At follow-up in 2010, nine percent men and 11% women in the study sample reported LTLBP. Table  
15  
16 2 shows the crude and adjusted binomial regression estimations of the association between healthy  
17  
18 lifestyle behaviour and the outcome.  
19  
20  
21  
22  
23  
24  
25  
26  
27  
28  
29  
30  
31  
32  
33  
34  
35  
36  
37  
38  
39  
40  
41  
42  
43  
44  
45  
46  
47  
48  
49  
50  
51  
52  
53  
54  
55  
56  
57  
58  
59  
60

1  
2  
3  
4  
5  
6  
7  
8  
9  
10  
11  
12  
13  
14  
15  
16  
17  
18  
19  
20  
21  
22  
23  
24  
25  
26  
27  
28  
29  
30  
31  
32  
33  
34  
35  
36  
37  
38  
39  
40  
41  
42  
43  
44  
45  
46  
47  
48  
49

Table 2. Association\* between healthy lifestyle behaviour and long duration troublesome low back pain (LTLBP) in men and women with occasional LBP at baseline in 2006.

|             | MEN<br>(n=3646) <sup>a</sup>             |                                          |                      |                                     |                | WOMEN<br>(n=4658) <sup>a</sup>  |                      |                                     |                |
|-------------|------------------------------------------|------------------------------------------|----------------------|-------------------------------------|----------------|---------------------------------|----------------------|-------------------------------------|----------------|
|             | Healthy lifestyle behaviour <sup>c</sup> | LTLBP/<br>no LTLBP <sup>d</sup><br>(n/n) | Crude                | Adjusted<br>(Age, SES) <sup>b</sup> |                | LTLBP/<br>no LTLBP <sup>d</sup> | Crude                | Adjusted<br>(Age, SES) <sup>b</sup> |                |
|             |                                          |                                          | RR<br>(95% CI)       | RR<br>(95% CI)                      | RD<br>(95% CI) |                                 | RR<br>(95% CI)       | RR<br>(95% CI)                      | RD<br>(95% CI) |
| <b>HLB0</b> | 14/155                                   | 1.0                                      | 1.0                  | 0.0                                 | 28/131         | 1.0                             | 1.0                  | 0.0                                 |                |
| <b>HLB1</b> | 71/812                                   | 0.97<br>(0.56, 1.68)                     | 1.02<br>(0.59, 1.76) | -0.01<br>(-0.06, 0.03)              | 94/735         | 0.64<br>(0.44, 0.95)            | 0.65<br>(0.44, 0.96) | -0.05<br>(-0.12, 0.01)              |                |
| <b>HLB2</b> | 133/1476                                 | 1.00<br>(0.59, 1.69)                     | 1.05<br>(0.62, 1.78) | -0.01<br>(-0.05, 0.04)              | 181/1721       | 0.54<br>(0.38, 0.78)            | 0.54<br>(0.38, 0.78) | -0.07<br>(-0.13, -0.01)             |                |
| <b>HLB3</b> | 60/818                                   | 0.82                                     | 0.85                 | -0.02                               | 125/1187       | 0.54                            | 0.55                 | -0.07                               |                |

|             |       |              |              |               |        |              |              |                |
|-------------|-------|--------------|--------------|---------------|--------|--------------|--------------|----------------|
|             |       | (0.47, 1.44) | (0.48, 1.48) | (-0.06, 0.02) |        | (0.37, 0.79) | (0.38, 0.81) | (-0.13, -0.01) |
| <b>HLB4</b> | 6/101 | 0.68         | 0.75         | -0.03         | 36/420 | 0.45         | 0.48         | -0.08          |
|             |       | (0.27, 1.71) | (0.30, 1.89) | (-0.07, 0.01) |        | (0.28, 0.71) | (0.31, 0.77) | (-0.15, -0.02) |

\*note: Log- binomial regression estimating the risk ratio (RR) and the risk difference (RD) with 95% confidence interval (95% CI).

<sup>a</sup> Reduced number of observations due to missing information about socio-economic status (SES) (men n=292 and women n=398).

<sup>b</sup> Adjusted for age in 10 year categories and socio-economic status (SES) in six categories.

<sup>c</sup> HLB0 = no healthy lifestyle factor, HLB1 = 1 of 4 healthy lifestyle factors, HLB2 = 2 of 4 factors, HLB3 = 3 of 4 factors, HLB4 = all 4 healthy lifestyle factors.

Healthy lifestyle factors included in HLB: non-smoking, no risk consumption of alcohol ( $\leq 168$  g 100% alcohol/week for men and  $\leq 108$  g 100% alcohol/week for women, and consuming alcohol corresponding to  $\approx$  half a bottle of spirits on the same occasion less than once a month), recommended level of leisure physical activity (at least 150 minutes at moderate intensity or 75 minutes at high intensity per week or a combination of these activities), and recommended consumption of fruit and vegetables ( $\geq 4$  servings of fruit and vegetables/day).

<sup>d</sup> Numbers of participants with and without LTLBP at follow-up in 2010.

1  
2  
3 There was a decreased risk for LTLBP at follow-up for women with a healthy lifestyle behaviour  
4 compared to women with unhealthy lifestyle behaviour (test for trend:  $p=0.006$ ). Twenty-one percent  
5 of women with no healthy lifestyle factor (HLB0) experienced LTLBP at follow-up compared to nine  
6  
7 percent of women with all four factors (HLB4). A five percent lower proportion of women with one  
8  
9 percent of women with all four factors (HLB4). A five percent lower proportion of women with one  
10  
11 healthy lifestyle factor, and an eight percent lower proportion of women with all four factors had  
12  
13 LTLBP, in comparison to the reference group (HLB0). Women with one healthy lifestyle factor and  
14  
15 women with all four healthy lifestyle factors had a 35% and a 52% lower risk for LTLBP,  
16  
17 respectively, compared to women with unhealthy lifestyle behaviour (HLB0). There were no clear  
18  
19 associations between healthy lifestyle behaviour and LTLBP found among men.

20  
21 SES was the only variable found to be a confounder, so the final log-binomial analyses were adjusted  
22  
23 by SES and age in 10 year categories. There was no effect measure modifications found.

24  
25  
26 Figure 3 shows the adjusted risk to develop LTLBP for men and women with occasional LBP by  
27  
28 categories of healthy lifestyle behaviour. Women had an overall higher adjusted risk for LTLBP than  
29  
30 men ( $p=0.001$ ).

31  
32  
33 The subjects lost to follow-up ( $n=4552$ ) had significantly lower proportions of healthy lifestyle factors  
34  
35 than the study sample ( $p < 0.01$  for all four factors). The differences in proportions were eight percent  
36  
37 for non-smoking, 16% for no risk consumption of alcohol, six percent for leisure physical activity and  
38  
39 five percent for consumption of fruit and vegetables.

## 40 41 42 **Discussion**

43  
44  
45 In this cohort study we found that healthy lifestyle behaviour had a positive influence on the prognosis  
46  
47 of occasional low back pain among women. Healthy lifestyle behaviour comprised four healthy  
48  
49 lifestyle factors: non-smoking, no risk consumption of alcohol, recommended level of leisure physical  
50  
51 activity and recommended consumption of fruit and vegetables. Compared to women with no healthy  
52  
53 lifestyle factor, the risk for development of long duration troublesome low back pain (LTLBP)  
54  
55 decreased by 35% among women with one healthy lifestyle factor and by 52% among women with all  
56  
57 four healthy lifestyle factors. In absolute terms, the proportion of women with LTLBP at follow-up  
58  
59  
60



1  
2  
3 was five percent lower if they had one healthy lifestyle factor and eight percent lower if they had four  
4 healthy lifestyle factors when compared to women with unhealthy lifestyle behaviour. These  
5 associations were not confirmed among men but the results indicated the same tendency.  
6  
7

8  
9  
10 Further, compared to women, men had an overall lower adjusted risk for LTLBP, and a low risk even  
11 in the unhealthy reference group (Figure 3). Men with unhealthy lifestyle behaviour had about the  
12 same risk for LTLBP as women with optimal healthy lifestyle behaviour. These findings were not  
13 aimed to be addressed in the present study and needs to be further investigated.  
14  
15  
16

17  
18 We found no studies concerning the effects of healthy lifestyle behaviour, defined as a combination of  
19 healthy lifestyle factors, on the prognosis of LBP or other types of spinal pain. Nevertheless,  
20 considering the risk of developing chronic back pain Pronk and colleagues showed results in line with  
21 our study.[2] Studying employees, the authors found that an “optimal lifestyle” decreased the 2-year  
22 risk of chronic LBP by 66% compared to employees with an unhealthy lifestyle. Having optimal  
23 lifestyle was equal to having all four of the healthy lifestyle factors similar to the ones included in our  
24 study: non-smoking, adequate physical activity, five servings of fruit and vegetables per day and  
25 limited or no alcohol consumption.  
26  
27  
28  
29  
30  
31  
32  
33  
34

### 35 **Strengths and limitations**

36  
37 To our knowledge this is the first study concerning the influence of healthy lifestyle behaviour (HLB)  
38 on the prognosis of LBP assessing men and women separately. Measuring the exposure prior to the  
39 outcome and the dose-response relationship found supports the validity of the associations between  
40 HLB and LTLBP found among women.[32] We believe the use of a complete study sample, the large  
41 sample size and the large number of potential confounders assessed strengthens the internal validity,  
42 though we cannot rule out residual or unmeasured confounding.[32] The questions used in this study  
43 have, since 1975, been used in several Swedish national and local public health surveys. They have on  
44 several occasions been tested (e.g. cognitive testing) and improved by Statistics Sweden’s test centre  
45 and several questions have shown to have acceptable psychometric properties. Moreover, information  
46 on education, disposable income, SES, country of birth and marital status were collected from  
47  
48  
49  
50  
51  
52  
53  
54  
55  
56  
57  
58  
59  
60

1  
2  
3 Swedish national registers known to have high quality. The questions concerning leisure physical  
4 activity and consumption of fruit and vegetables have shown to have acceptable validity and  
5 reliability, and the method to measure alcohol consumption has been recommended by Romelsjö and  
6 colleagues.[35-38] Despite this the measurements used may not have been optimal in terms of validity  
7 and reliability.  
8  
9

10  
11  
12 Our study also has limitations. Self-reported exposure information may be hampered by low accuracy.  
13 For example, some participants may wish to present themselves in a favourable light and overestimate  
14 their healthy lifestyle (social desirability) or some may have difficulties understanding the questions  
15 and therefore report less well.[32, 39, 40] This could lead to misclassification of the exposure which  
16 may result in an under- or overestimation of the association. As this potential misclassification is  
17 likely to be non-differential it would probably dilute a true association, at least when comparing  
18 extremes.[32] Moreover, if men tend to misclassify their healthy lifestyle factors to a greater extent  
19 than women this may partly explain why we did not find any associations among men. For example,  
20 Dyrstad and colleagues found that men overestimated their self-reported physical activity when  
21 compared to accelerometer-measures to a greater extent than women.[41] As we studied a population  
22 between 18-84 years old a large proportion of the participants did not provide work related  
23 information why we did not assess potential confounding effects from work related variables,  
24 something that may have affected the results. About 34% of participants in the baseline survey were  
25 not part of the study sample due to attrition and exclusion (Figure 1). These subjects had significantly  
26 lower proportions of healthy lifestyle factors than the study sample. This may have biased our result,  
27 most probably leading to an underestimation of the associations.  
28  
29

30  
31  
32 Considering strengths and limitations in our study we regard our result as a valid contribution to the  
33 body of research showing that a healthy lifestyle affects health problems.[1-5] Our study results  
34 showing that healthy lifestyle behaviour influences the prognosis of LBP are new and important  
35 knowledge with the potential to have an impact on a very common public health problem and have  
36 implications both in a public-health and a clinical perspective. Even though the association for healthy  
37 lifestyle behaviour to affect LBP among men was not clear, the results showed the same tendency as  
38  
39  
40  
41  
42  
43  
44  
45  
46  
47  
48  
49  
50  
51  
52  
53  
54  
55  
56  
57  
58  
59  
60

1  
2  
3 for women. Considering this together with the obvious effect of healthy lifestyle on other health  
4 problems the work to encourage both men and women to adapt to healthy lifestyle should certainly be  
5 continued.  
6  
7  
8  
9

## 10 **Conclusion**

11  
12 Healthy lifestyle behaviour, defined as combinations of non-smoking, no risk consumption of alcohol,  
13 recommended level of leisure physical activity and recommended consumption of fruit and vegetables,  
14 decreases the risk of developing long duration troublesome low back pain among women with  
15 occasional low back pain. There were no clear associations found among men.  
16  
17  
18  
19  
20  
21  
22  
23  
24

25 **Contributors:** TB, ES, LA, EV and IJ contributed to the design of the study. JH and LA were part of  
26 the expert group responsible for the design and implementation of the SPHC cohort. TB made the  
27 statistical analyses and wrote the first manuscript version. All authors contributed to the interpretation  
28 of the data and critically revised all versions of the manuscript and finally approved the last version.  
29  
30  
31  
32

33 **Acknowledgements:** We would like to thank professor Matteo Bottai at the Institute of  
34 Environmental Medicine, Karolinska Institutet, for advice regarding the statistical analyses, and  
35 assistant professor Jill Hayden at the Faculty of Medicine, Dalhousie University, for valuable  
36 comments on the manuscript.  
37  
38  
39  
40  
41

42 **Funding:** The Stockholm County Council provided the financial support to form The Stockholm  
43 Public Health Cohort. TB had his salary provided by The Health Care Sciences Postgraduate School at  
44 Karolinska Institutet, Stockholm, Sweden. ES was financially supported by the AFA Insurance  
45 postdoc scholarship. Funders had no role in the collection, analyses or interpretation of the data, or in  
46 the writing of the article.  
47  
48  
49  
50  
51

52 **Competing interests:** None declared.  
53  
54

55 **Ethical approval:** The regional ethical review board in Stockholm, Sweden, approved the study  
56 (Diary nr. 2013/497-32).  
57  
58  
59  
60

1  
2  
3 **Data sharing:** No additional data available.  
4

5 **Transparency:** The lead author (TB) affirms that the manuscript is an honest, accurate, and  
6 transparent account of the study being reported; that no important aspects of the study have been  
7 omitted; and that any discrepancies from the study as planned have been explained.  
8  
9  
10

## 11 **References**

- 12 1. Ford ES, Bergman M. Healthy Living Is Best Revenge; Findings From the European  
13 Prospective Investigation Into Cancer and Nutrition - Postdam Study. *Arch Intern Med*  
14 2009;169(15):1355-62.  
15
- 16 2. Pronk NP, Lowry M, Kottke TE, *et al.* The association between optimal lifestyle adherence and  
17 short-term incidence of chronic conditions among employees. *Popul Health Manag*  
18 2010;13(6):289-95.  
19
- 20 3. Towfighi A, Markovic D, Ovbiagele B. Impact of a healthy lifestyle on all-cause and  
21 cardiovascular mortality after stroke in the USA. *J Neurol Neurosurg Psychiatry*  
22 2012;83(2):146-51.  
23
- 24 4. Ford ES, Bergmann MM, Boeing H, *et al.* Healthy lifestyle behaviors and all-cause mortality  
25 among adults in the United States. *Prev Med* 2012;55(1):23-7.  
26
- 27 5. Chow CK, Jolly S, Rao-Melacini P, *et al.* Association of diet, exercise, and smoking  
28 modification with risk of early cardiovascular events after acute coronary syndromes.  
29 *Circulation* 2010;121(6):750-8.  
30
- 31 6. Hoy D, Bain C, Williams G, *et al.* A systematic review of the global prevalence of low back  
32 pain. *Arthritis Rheum* 2012;64(6):2028-37.  
33
- 34 7. Hoy D, Brooks P, Blyth F, *et al.* The Epidemiology of low back pain. *Best Pract Res Clin*  
35 *Rheumatol* 2010;24(6):769-81.  
36
- 37 8. Hayden JA, Chou R, Hogg-Johnson S, *et al.* Systematic reviews of low back pain prognosis had  
38 variable methods and results: guidance for future prognosis reviews. *Journal of Clinical*  
39 *Epidemiology* 2009;62(8):781-96.  
40  
41  
42  
43  
44  
45  
46  
47  
48  
49  
50  
51  
52  
53  
54  
55  
56  
57  
58  
59  
60

- 1  
2  
3 9. Iles RA, Davidson M, Taylor NF, *et al.* Systematic review of the ability of recovery  
4 expectations to predict outcomes in non-chronic non-specific low back pain. *J Occup Rehabil*  
5 2009;19(1):25-40.  
6  
7
- 8  
9 10. Verkerk K, Luijsterburg PA, Miedema HS, *et al.* Prognostic factors for recovery in chronic  
10 nonspecific low back pain: a systematic review. *Phys Ther* 2012;92(9):1093-108.  
11  
12
- 13 11. Hendrick P, Milosavljevic S, Hale L, *et al.* The relationship between physical activity and low  
14 back pain outcomes: a systematic review of observational studies. *Eur Spine J* 2011;20(3):464-  
15 74.  
16  
17
- 18 12. Messing K, Stock SR, Tissot F. Should studies of risk factors for musculoskeletal disorders be  
19 stratified by gender? Lessons from the 1998 Quebec Health and Social Survey. *Scand J Work*  
20 *Environ Health* 2009;35(2):96-112.  
21  
22
- 23 13. Chenot JF, Becker A, Leonhardt C, *et al.* Sex differences in presentation, course, and  
24 management of low back pain in primary care. *Clin J Pain* 2008;24(7):578-84.  
25  
26
- 27 14. Bohman T, Alfredsson L, Hallqvist J, *et al.* The influence of self-reported leisure time physical  
28 activity and the body mass index on recovery from persistent back pain among men and women:  
29 a population-based cohort study. *BMC Public Health* 2013;13(1):385.  
30  
31
- 32 15. Svensson AC, Fredlund P, Laflamme L, *et al.* Cohort Profile: The Stockholm Public Health  
33 Cohort. *Int J Epidemiol* 2013;42(5):1263-72.  
34  
35
- 36 16. Kuorinka I, Jonsson B, Kilbom A, *et al.* Standardised Nordic questionnaires for the analysis of  
37 musculoskeletal symptoms. *Appl Ergon* 1987;18(3):233-7.  
38  
39
- 40 17. The National Board of Health and Welfare (Socialstyrelsen). Nationella riktlinjer för  
41 sjukdomsförebyggande metoder 2011 – stöd för styrning och ledning (National guidelines for  
42 disease prevention methods 2011). Stockholm, Sweden 2011; 16-17,  
43  
44  
45  
46  
47  
48  
49  
50  
51  
52  
53  
54  
55  
56  
57  
58  
59  
60  
www.socialstyrelsen.se/publikationer2011/2011-11-11 (accessed May 2014).
18. World Health Organisation (WHO). Diet, nutrition and the prevention of chronic diseases,  
Report of the joint WHO/FAO expert consultation. WHO Technical Report Series No. 916.  
Geneva, Switzerland 2003. [www.who.int/dietphysicalactivity/publications/trs916/en/](http://www.who.int/dietphysicalactivity/publications/trs916/en/) (accessed  
May 2014).

- 1  
2  
3 19. World Health Organisation (WHO). Global recommendations on physical activity for health.  
4 Geneva, Switzerland 2010. [www.who.int/dietphysicalactivity/factsheet\\_recommendations/en/](http://www.who.int/dietphysicalactivity/factsheet_recommendations/en/)  
5 (accessed May 2014).  
6  
7
- 8  
9 20. Andreasson S, Allebeck P. Alkohol och Hälsa. Swedish National Institute of Public Health  
10 (Statens Folkhälsoinstitut) r 2005:11. Stockholm, Sweden,  
11 [www.folkhalsomyndigheten.se/publicerat-material/publikationer/Alkohol-och-halsa/](http://www.folkhalsomyndigheten.se/publicerat-material/publikationer/Alkohol-och-halsa/) (accessed  
12 May 2014).  
13  
14
- 15  
16  
17 21. Dionne CE, Dunn KM, Croft PR, *et al.* A consensus approach toward the standardization of  
18 back pain definitions for use in prevalence studies. *Spine (Phila Pa 1976)* 2008;33(1):95-103.  
19
- 20  
21 22. Palmlof L, Skillgate E, Alfredsson L, *et al.* Does income matter for troublesome neck pain? A  
22 population-based study on risk and prognosis. *J Epidemiol Community Health*  
23 2012;66(11):1063-70.  
24  
25
- 26  
27 23. Carroll LJ, Hogg-Johnson S, van der Velde G, *et al.* Course and prognostic factors for neck pain  
28 in the general population: results of the Bone and Joint Decade 2000-2010 Task Force on Neck  
29 Pain and Its Associated Disorders. *Spine* 2008;33(4 Suppl):S75-82.  
30  
31
- 32  
33 24. McDowell I. Measuring health a guide to rating scales and questionnaires. 3rd ed. Oxford  
34 University Press, 2006.  
35  
36
- 37  
38 25. Goldberg DP, Gater R, Sartorius N, *et al.* The validity of two versions of the GHQ in the WHO  
39 study of mental illness in general health care. *Psychol Med* 1997;27(1):191-7.  
40  
41
- 42  
43 26. Unden AL, Orth-Gomer K. Development of a social support instrument for use in population  
44 surveys. *Soc Sci Med* 1989;29(12):1387-92.  
45  
46
- 47  
48 27. Statistics Sweden. Socioekonomisk indelning (SEI) (Socio-economic classification system). In:  
49 Fastbom L. Meddelanden i samordningsfrågor för Sveriges officiella statistik (MIS), rep No.  
50 1982:4:6-8. Stockholm, 1984. [www.scb.se/sv/\\_Hitta-statistik/Publiceringskalender/Visa-](http://www.scb.se/sv/_Hitta-statistik/Publiceringskalender/Visa-detaljrad-information/?PublObjId=6607)  
51 [detaljrad-information/?PublObjId=6607](http://www.scb.se/sv/_Hitta-statistik/Publiceringskalender/Visa-detaljrad-information/?PublObjId=6607) (accessed May 2014).  
52  
53
- 54  
55 28. Statistics Sweden. Longitudinal Intergration data base for health insurance - and laubormarket  
56 studies (LISA). Secondary Longitudinal Intergration data base for health insurance - and  
57 laubormarket studies (LISA), 2009. [www.scb.se/lisa/](http://www.scb.se/lisa/) (accessed May 2014).  
58  
59  
60

- 1  
2  
3  
4  
5  
6  
7  
8  
9  
10  
11  
12  
13  
14  
15  
16  
17  
18  
19  
20  
21  
22  
23  
24  
25  
26  
27  
28  
29  
30  
31  
32  
33  
34  
35  
36  
37  
38  
39  
40  
41  
42  
43  
44  
45  
46  
47  
48  
49  
50  
51  
52  
53  
54  
55  
56  
57  
58  
59  
60
29. Carroll LJ, Hurwitz EL, Cote P, *et al.* Research priorities and methodological implications: the Bone and Joint Decade 2000-2010 Task Force on Neck Pain and Its Associated Disorders. *Spine* 2008;33(4 Suppl):S214-20.
  30. Kurth T, Sonis J. Assessment and control of confounding in trauma research. *J Trauma Stress* 2007;20(5):807-20.
  31. Tong IS, Lu Y. Identification of confounders in the assessment of the relationship between lead exposure and child development. *Ann Epidemiol* 2001;11(1):38-45.
  32. Rothman KJ, Greenland S, Lash TL. *Modern epidemiology*. 3rd ed. Wolters Kluwer Health/Lippincott Williams & Wilkins, 2008.
  33. Mickey RM, Greenland S. The impact of confounder selection criteria on effect estimation. *Am J Epidemiol* 1989;129(1):125-37.
  34. Hosmer DW, Lemeshow S. *Applied logistic regression*. 2nd ed. Wiley, 2000.
  35. Orsini N, Bellocco R, Bottai M, *et al.* Validity of self-reported total physical activity questionnaire among older women. *Eur J Epidemiol* 2008;23(10):661-7.
  36. Romelsjo A, Leifman H, Nystrom S. A comparative study of two methods for the measurement of alcohol consumption in the general population. *Int J Epidemiol* 1995;24(5):929-36.
  37. Sepp H, Ekelund U, Becker W. Enkätfrågor om kost och fysisk aktivitet bland vuxna - Underlag till urval av frågor i befolkningsinriktade enkäter. Swedish National Food Administration, rep No. 21, 2004. [www.slv.se/sv/grupp1/Mat-och-naring/Matvanor---undersokningar/Hur-undersoks-matvanor/Validerade-enkatfragor-om-kost-och-fysisk-aktivitet/](http://www.slv.se/sv/grupp1/Mat-och-naring/Matvanor---undersokningar/Hur-undersoks-matvanor/Validerade-enkatfragor-om-kost-och-fysisk-aktivitet/) (accessed May 2014).
  38. Ekelund U, Sepp H, Brage S, *et al.* Criterion-related validity of the last 7-day, short form of the International Physical Activity Questionnaire in Swedish adults. *Public Health Nutrition* 2006;9(02):258-65.
  39. Connor Gorber S, Schofield-Hurwitz S, Hardt J, *et al.* The accuracy of self-reported smoking: a systematic review of the relationship between self-reported and cotinine-assessed smoking status. *Nicotine Tob Res* 2009;11(1):12-24

- 1  
2  
3 40. Ainsworth BE, Levy SS. Methodological issues. In: Oja P, Borms J. Health enhancing physical  
4 activity. Meyer & Meyer Sport, 2004.  
5  
6  
7 41. Dyrstad SM, Hansen BH, Holme IM, *et al.* Comparison of self-reported versus accelerometer-  
8 measured physical activity. *Med Sci Sports Exerc* 2014;46(1):99-106.  
9  
10

11  
12  
13  
14 Figure 1. Flowchart of the inclusion process for the study sample. LBP: low back pain.  
15

16  
17 Figure 2. Distribution of healthy lifestyle factors. PA: Leisure physical activity. F/V: Fruit and  
18 vegetables.  
19

20  
21 Figure 3. Estimated risk for LTLBP, adjusted for SES and age. Men (n=3646), women (n=4658).  
22  
23  
24  
25  
26  
27  
28  
29  
30  
31  
32  
33  
34  
35  
36  
37  
38  
39  
40  
41  
42  
43  
44  
45  
46  
47  
48  
49  
50  
51  
52  
53  
54  
55  
56  
57  
58  
59  
60



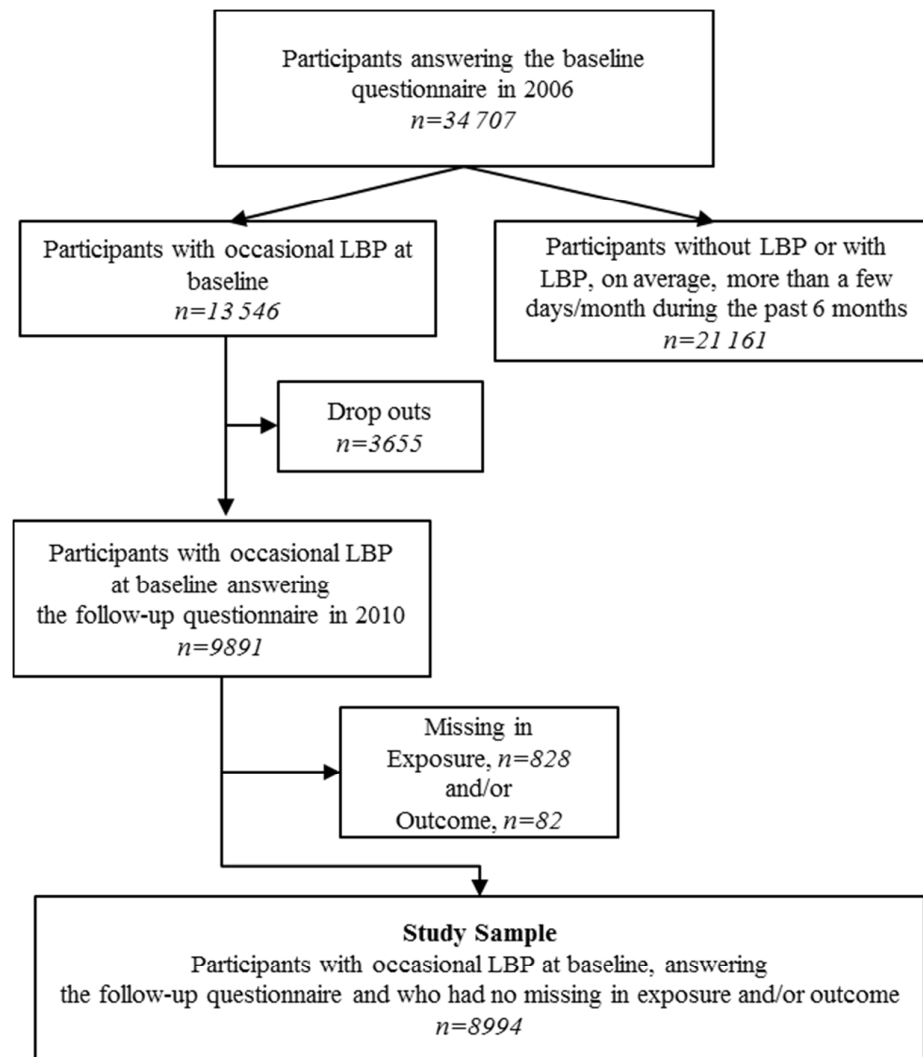

1  
2  
3  
4  
5  
6  
7  
8  
9  
10  
11  
12  
13  
14  
15  
16  
17  
18  
19  
20  
21  
22  
23  
24  
25  
26  
27  
28  
29  
30  
31  
32  
33  
34  
35  
36  
37  
38  
39  
40  
41  
42  
43  
44  
45  
46  
47  
48  
49  
50  
51  
52  
53  
54  
55  
56  
57  
58  
59  
60

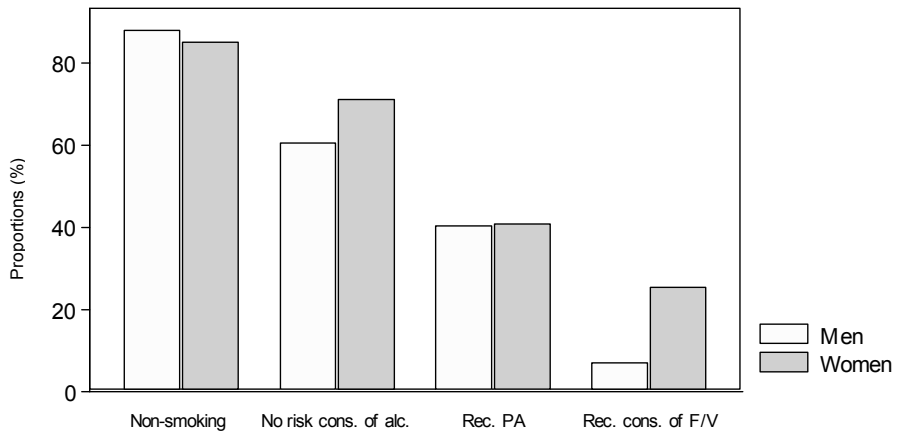

review only

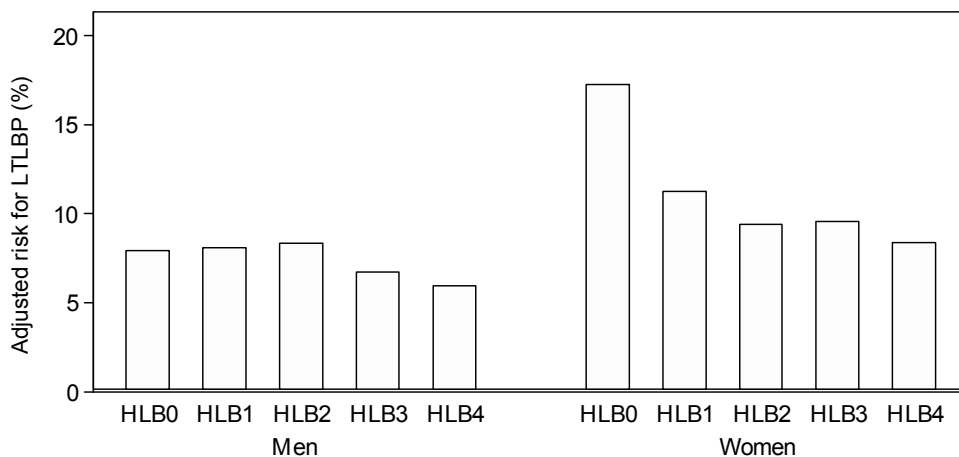

For peer review only

1  
2  
3  
4  
5  
6  
7  
8  
9  
10  
11  
12  
13  
14  
15  
16  
17  
18  
19  
20  
21  
22  
23  
24  
25  
26  
27  
28  
29  
30  
31  
32  
33  
34  
35  
36  
37  
38  
39  
40  
41  
42  
43  
44  
45  
46  
47  
48  
49  
50  
51  
52  
53  
54  
55  
56  
57  
58  
59  
60

## Appendix

Construction of the binary lifestyle factor variables incorporated in the exposure variable “healthy lifestyle behaviour” (HLB), based on questions from the baseline questionnaire in 2006 (Health Survey 2006, Stockholm County Council).

### Non-smoking:

26. Do you smoke daily?

1  No

2  Yes

### Recommended level of leisure physical activity:

24. How much have you exercised and exerted yourself physically in *the past 12 months*?

*If your activity for example varies between summer and winter, try to state an average. Indicate one alternative.*

1  Sedentary leisure time

*You spend most of your time reading, watching TV, going to movie theatres or carrying out some other form of sedentary activity. You take walks, cycle or exercise in some other way for less than 2 hours per week.*

2  Moderate leisure time exercise

*You take walks, cycle or exercise in some other way for at least 2 hours per week, usually without sweating. This also includes walks, ordinary garden chores, fishing, table tennis and bowling.*

3  Moderate, regular leisure time exercise

*You exercise regularly 1–2 times per week for at least 30 minutes each time by jogging, swimming, playing tennis, badminton or through another activity that makes you sweat.*

4  Regular leisure time exercise and training

*You, for example, jog, swim, play tennis or badminton or carry out gymnastics or the like and which makes you sweat an average of at least 3 times a week. Each occasion lasts at least 30 minutes..*

25. How many days in **an average week** do you devote to at least 30 minutes of physical activity that makes you grow warm?

*Count fitness training as well as brisk walks, gardening work, heavy household work, cycling, swimming and the like. This may vary during the year, but try to state an average.*

days a week

“Recommended level of leisure physical activity” was theoretically defined as performing leisure physical activity at least 150 minutes at moderate intensity or 75 minutes at high intensity per week or a combination of these activities. This was equal to alternative 4 in question no.24 OR  $\geq 5$  days a week

in question no.25 OR a combination of alternative 3 in question no.24 and 3 or 4 days a week in question no.25.

**No risk consumption of alcohol:**

31. What are your alcohol habits during a typical week?

This may vary during the year, but try to state an average. First assess for each day how much you usually drink of the various alcoholic beverages. State in the table what you arrived at in centiliters (cl).

*Example:*  
 If you drink as follows:  
 1 bottle of medium-strong beer for lunch Monday-Thursday (33x4 = 132 cl.).  
 Tuesday evening, 1 glass of wine (5 cl.).  
 Wednesday evening, 2 cans of beer (2x50 = 100 cl.).  
 Friday evening, a half bottle of wine (37 cl.).  
 Saturday evening, 1 glass of wine (20 cl.) and 1 big cocktail (6 cl. of spirits).  
 Sunday lunch, 1 shot (3 cl. of spirits) and 1 can of beer (50 cl.).

Then you would fill in the table as follows:

|                 | Spirit                         | Strong Wine                    | Wine                            | Strong Beer                      | Beer (Folköl)                    | Strong cider/Alcopop |
|-----------------|--------------------------------|--------------------------------|---------------------------------|----------------------------------|----------------------------------|----------------------|
| Monday-Thursday | <input type="text"/>           | <input type="text" value="5"/> | <input type="text"/>            | <input type="text" value="100"/> | <input type="text" value="132"/> | <input type="text"/> |
| Friday          | <input type="text"/>           | <input type="text"/>           | <input type="text" value="37"/> | <input type="text"/>             | <input type="text"/>             | <input type="text"/> |
| Saturday        | <input type="text" value="6"/> | <input type="text"/>           | <input type="text" value="20"/> | <input type="text"/>             | <input type="text"/>             | <input type="text"/> |
| Sunday          | <input type="text" value="3"/> | <input type="text"/>           | <input type="text"/>            | <input type="text" value="50"/>  | <input type="text"/>             | <input type="text"/> |

1 small shot or cocktail = 3 cl  
 1 cocktail = 6 cl  
 1 glass of wine = 5 cl  
 1 glass of wine = 20 cl  
 1 half-bottle of wine = 37 cl

1 bottle of wine = 75 cl  
 1 half-bottle of spirits = 35 cl  
 1 bottle of spirits = 70 cl  
 1 bottle of Alco pop = 27 cl  
 1 bottle/can of beer or strong cider - may contain 33 or 50 cl

For the day(s) you drink an alcoholic beverage, you should indicate in cl., how much you drink. The boxes should only be filled in for the days when you drink a certain alcoholic beverage.

|                 | Spirit               | Wine                 | L.a. Wine            | Beer                 | M.s.beer             | Strong cider/alcopop |
|-----------------|----------------------|----------------------|----------------------|----------------------|----------------------|----------------------|
| Monday-Thursday | <input type="text"/> |
| Friday          | <input type="text"/> |
| Saturday        | <input type="text"/> |
| Sunday          | <input type="text"/> |

Grams of 100% alcohol/week were calculated by summarizing the volume of each of the different alcoholic beverage consumed over the week, multiply this sum with the volume percentage of alcohol

for the specific beverage and finally summarize the volume percentage for all beverages.

As an example from above, the grams of 100% alcohol from strong beer was  $150 \times 0.053$  (volume % in Swedish strong beer) = 7.95 g of 100% alcohol etc.

32. How often do you, on the same occasion, drink alcoholic beverages equivalent to at least:

- A half bottle of spirits
  - or 2 bottles of wine
  - or 6 cans of beer (8 bottles)
  - or 12 bottles of medium-strong beer
- 1  Virtually every day (at least 5 days per week)
- 2  A few times per week (3–4 times per week)
- 3  Once or twice per week
- 4  2–3 times per month
- 5  Once a month
- 6  1–6 times per year
- 7  Never

Using a combination of question no.31 and no.32, “No risk consumption of alcohol” was theoretically defined as drinking;  $\leq 168$  g 100% alcohol/week for men and  $\leq 108$  g 100% alcohol/week for women, *AND* alternative 6 or 7 on question no.32 (= consuming alcohol corresponding to  $\approx$  half a bottle of spirits on the same occasion less than once a month).

#### Recommended consumption of fruit and vegetables:

21. How often do you eat fruits or berries?

*Think of the past 12 months. Count fresh, canned and frozen (for example 1 apple, 1 banana, 1 bunch of grapes, 1 glass of juice, 1 bowl of strawberries or 2 slices of pineapple).*

I eat fruits or berries:

- 1  A few times per month or never      0
- 2  Around once a week      0
- 3  A few times per week      0.5
- 4  Virtually every day      1
- 5  2 times per day      2
- 6  3 or more times per day      3

## 22. How often do you eat a portion of vegetables/root vegetables?

*Think of the past 12 months. Count fresh, frozen, canned, stewed in addition to dishes including vegetables (for example ½ bell pepper, 1 tomato, 1–2 dl. shredded carrot, 1–2 dl. mixed vegetables or 1 bowl of lentil soup).*

*I eat a portion of vegetables/root vegetables:*

- |                          |                                |     |
|--------------------------|--------------------------------|-----|
| <input type="checkbox"/> | A few times per month or never | 0   |
| <input type="checkbox"/> | Around once a week             | 0   |
| <input type="checkbox"/> | A few times per week           | 0.5 |
| <input type="checkbox"/> | Virtually every day            | 1   |
| <input type="checkbox"/> | 2 times per day                | 2   |
| <input type="checkbox"/> | 3 or more times per day        | 3   |

The six answer alternatives on question no.21 and no.22 were assigned a score from 0 to 3.

“Recommended consumption of fruit and vegetables” was theoretically defined as having a sum score from the two questions of  $\geq 4$ . This was equal to eating fruit and vegetables every day and to a minimum of 4 servings per day ( $\approx 400$  g/day).

Tony Bohman

STROBE Statement—Checklist of items that should be included in reports of *cohort studies*

|                              | Item No | Recommendation                                                                                                                                                                                                                                                                                                                                                                                                                                                                                                                          |
|------------------------------|---------|-----------------------------------------------------------------------------------------------------------------------------------------------------------------------------------------------------------------------------------------------------------------------------------------------------------------------------------------------------------------------------------------------------------------------------------------------------------------------------------------------------------------------------------------|
| <b>Title and abstract</b>    | 1       | (a) Indicate the study's design with a commonly used term in the title or the abstract <b>p.1</b><br>(b) Provide in the abstract an informative and balanced summary of what was done and what was found <b>p.2-3</b>                                                                                                                                                                                                                                                                                                                   |
| <b>Introduction</b>          |         |                                                                                                                                                                                                                                                                                                                                                                                                                                                                                                                                         |
| Background/rationale         | 2       | Explain the scientific background and rationale for the investigation being reported <b>p.4-5</b>                                                                                                                                                                                                                                                                                                                                                                                                                                       |
| Objectives                   | 3       | State specific objectives, including any prespecified hypotheses <b>p. 5 paragraph 1 and 2</b>                                                                                                                                                                                                                                                                                                                                                                                                                                          |
| <b>Methods</b>               |         |                                                                                                                                                                                                                                                                                                                                                                                                                                                                                                                                         |
| Study design                 | 4       | Present key elements of study design early in the paper <b>Method; paragraph 1</b>                                                                                                                                                                                                                                                                                                                                                                                                                                                      |
| Setting                      | 5       | Describe the setting, locations, and relevant dates, including periods of recruitment, exposure, follow-up, and data collection <b>Methods; paragraph 1-2, fig. 1</b>                                                                                                                                                                                                                                                                                                                                                                   |
| Participants                 | 6       | (a) Give the eligibility criteria, and the sources and methods of selection of participants. Describe methods of follow-up <b>Methods; paragraph 1-2, fig. 1</b><br>(b) For matched studies, give matching criteria and number of exposed and unexposed                                                                                                                                                                                                                                                                                 |
| Variables                    | 7       | Clearly define all outcomes, exposures, predictors, potential confounders, and effect modifiers. Give diagnostic criteria, if applicable <b>Methods; p. 6-7</b>                                                                                                                                                                                                                                                                                                                                                                         |
| Data sources/<br>measurement | 8*      | For each variable of interest, give sources of data and details of methods of assessment (measurement). Describe comparability of assessment methods if there is more than one group <b>Methods; p. 6-7</b>                                                                                                                                                                                                                                                                                                                             |
| Bias                         | 9       | Describe any efforts to address potential sources of bias <b>Methods; p.5 – random selection, stratification for gender and residential area</b>                                                                                                                                                                                                                                                                                                                                                                                        |
| Study size                   | 10      | Explain how the study size was arrived at <b>Methods; paragraph 1 and 2, p.5-6, fig.1</b>                                                                                                                                                                                                                                                                                                                                                                                                                                               |
| Quantitative variables       | 11      | Explain how quantitative variables were handled in the analyses. If applicable, describe which groupings were chosen and why <b>Methods; p.6-7, Appendix</b>                                                                                                                                                                                                                                                                                                                                                                            |
| Statistical methods          | 12      | (a) Describe all statistical methods, including those used to control for confounding <b>Statistical methods; p.8</b><br>(b) Describe any methods used to examine subgroups and interactions <b>Statistical methods; p.8</b><br>(c) Explain how missing data were addressed <b>Fig. 1, table 1 and 2</b><br>(d) If applicable, explain how loss to follow-up was addressed <b>Methods, Study design and source population and fig. 1</b><br>(e) Describe any sensitivity analyses <b>Methods; p.8 last part of Statistical methods.</b> |
| <b>Results</b>               |         |                                                                                                                                                                                                                                                                                                                                                                                                                                                                                                                                         |
| Participants                 | 13*     | (a) Report numbers of individuals at each stage of study—eg numbers potentially eligible, examined for eligibility, confirmed eligible, included in the study, completing follow-up, and analysed <b>Fig. 1, table 1 and 2</b><br>(b) Give reasons for non-participation at each stage – <b>no information on reason</b><br>(c) Consider use of a flow diagram <b>Fig. 1</b>                                                                                                                                                            |
| Descriptive data             | 14*     | (a) Give characteristics of study participants (eg demographic, clinical, social) and information on exposures and potential confounders <b>Table 1</b><br>(b) Indicate number of participants with missing data for each variable of interest                                                                                                                                                                                                                                                                                          |



**Table 1**

| <b>(e) Summarise follow-up time (eg, average and total amount)</b> |     |                                                                                                                                                                                                                                                     |
|--------------------------------------------------------------------|-----|-----------------------------------------------------------------------------------------------------------------------------------------------------------------------------------------------------------------------------------------------------|
| Outcome data                                                       | 15* | Report numbers of outcome events or summary measures over time <b>Table 2</b>                                                                                                                                                                       |
| Main results                                                       | 16  | (a) Give unadjusted estimates and, if applicable, confounder-adjusted estimates and their precision (eg, 95% confidence interval). Make clear which confounders were adjusted for and why they were included <b>Table 2 and statistical methods</b> |
|                                                                    |     | (b) Report category boundaries when continuous variables were categorized <b>Statistical methods; p. 8, Age categorised into 10 yr intervals. Results; table 1 and table 2.</b>                                                                     |
|                                                                    |     | (c) If relevant, consider translating estimates of relative risk into absolute risk for a meaningful time period <b>Table 2</b>                                                                                                                     |
| Other analyses                                                     | 17  | Report other analyses done—eg analyses of subgroups and interactions, and sensitivity analyses <b>Statistical methods; p.8. Results; p. 15. Trend test, effect modification and loss to follow-up.</b>                                              |
| <b>Discussion</b>                                                  |     |                                                                                                                                                                                                                                                     |
| Key results                                                        | 18  | Summarise key results with reference to study objectives <b>Discussion; first paragraph</b>                                                                                                                                                         |
| Limitations                                                        | 19  | Discuss limitations of the study, taking into account sources of potential bias or imprecision. Discuss both direction and magnitude of any potential bias <b>p. 17 middle paragraph.</b>                                                           |
| Interpretation                                                     | 20  | Give a cautious overall interpretation of results considering objectives, limitations, multiplicity of analyses, results from similar studies, and other relevant evidence <b>Discussion; last paragraph p. 17 and first paragraph p 18.</b>        |
| Generalisability                                                   | 21  | Discuss the generalisability (external validity) of the study results <b>Discussion; last paragraph.</b>                                                                                                                                            |
| <b>Other information</b>                                           |     |                                                                                                                                                                                                                                                     |
| Funding                                                            | 22  | Give the source of funding and the role of the funders for the present study and, if applicable, for the original study on which the present article is based <b>Funding and Competing interests p. 18.</b>                                         |

\*Give information separately for exposed and unexposed groups.

**Note:** An Explanation and Elaboration article discusses each checklist item and gives methodological background and published examples of transparent reporting. The STROBE checklist is best used in conjunction with this article (freely available on the Web sites of PLoS Medicine at <http://www.plosmedicine.org/>, Annals of Internal Medicine at <http://www.annals.org/>, and Epidemiology at <http://www.epidem.com/>). Information on the STROBE Initiative is available at <http://www.strobe-statement.org>.

# BMJ Open

## Does healthy lifestyle behaviour influence the prognosis of low back pain among men and women in a general population? A population based cohort study.

|                                 |                                                                                                                                                                                                                                                                                                                                                                                                                                                                                                                                                                                                                                                                                                   |
|---------------------------------|---------------------------------------------------------------------------------------------------------------------------------------------------------------------------------------------------------------------------------------------------------------------------------------------------------------------------------------------------------------------------------------------------------------------------------------------------------------------------------------------------------------------------------------------------------------------------------------------------------------------------------------------------------------------------------------------------|
| Journal:                        | <i>BMJ Open</i>                                                                                                                                                                                                                                                                                                                                                                                                                                                                                                                                                                                                                                                                                   |
| Manuscript ID:                  | bmjopen-2014-005713.R1                                                                                                                                                                                                                                                                                                                                                                                                                                                                                                                                                                                                                                                                            |
| Article Type:                   | Research                                                                                                                                                                                                                                                                                                                                                                                                                                                                                                                                                                                                                                                                                          |
| Date Submitted by the Author:   | 22-Oct-2014                                                                                                                                                                                                                                                                                                                                                                                                                                                                                                                                                                                                                                                                                       |
| Complete List of Authors:       | <p>Bohman, Tony; Karolinska Institutet, Institute of Environmental Medicine Alfredsson, Lars; Karolinska Institutet, Institute of Environmental Medicine; Stockholm County Council, Centre for Occupational and Environmental Medicine</p> <p>Jensen, Irene; Karolinska Institutet, Institute of Environmental Medicine Hallqvist, Johan; Uppsala University, Department of Public Health and Caring Sciences; Karolinska Universitetssjukhuset, Department of Public Health Sciences</p> <p>Vingard, Eva; Uppsala University, Department of Medical Science Skillgate, Eva; Karolinska Institutet, Institute of Environmental Medicine; Scandinavian College of Naprapathic Manual Medicine,</p> |
| <b>Primary Subject Heading</b>: | Epidemiology                                                                                                                                                                                                                                                                                                                                                                                                                                                                                                                                                                                                                                                                                      |
| Secondary Subject Heading:      | Public health                                                                                                                                                                                                                                                                                                                                                                                                                                                                                                                                                                                                                                                                                     |
| Keywords:                       | Back pain < ORTHOPAEDIC & TRAUMA SURGERY, Public health < INFECTIOUS DISEASES, Epidemiology < TROPICAL MEDICINE                                                                                                                                                                                                                                                                                                                                                                                                                                                                                                                                                                                   |
|                                 |                                                                                                                                                                                                                                                                                                                                                                                                                                                                                                                                                                                                                                                                                                   |

SCHOLARONE™  
Manuscripts

Tony Bohman

STROBE Statement—Checklist of items that should be included in reports of *cohort studies*

|                              | Item No | Recommendation                                                                                                                                                                                                                                                                                                                                                                                                                                                                                                                          |
|------------------------------|---------|-----------------------------------------------------------------------------------------------------------------------------------------------------------------------------------------------------------------------------------------------------------------------------------------------------------------------------------------------------------------------------------------------------------------------------------------------------------------------------------------------------------------------------------------|
| <b>Title and abstract</b>    | 1       | (a) Indicate the study's design with a commonly used term in the title or the abstract <b>p.1</b><br>(b) Provide in the abstract an informative and balanced summary of what was done and what was found <b>p.2-3</b>                                                                                                                                                                                                                                                                                                                   |
| <b>Introduction</b>          |         |                                                                                                                                                                                                                                                                                                                                                                                                                                                                                                                                         |
| Background/rationale         | 2       | Explain the scientific background and rationale for the investigation being reported <b>p.4-5</b>                                                                                                                                                                                                                                                                                                                                                                                                                                       |
| Objectives                   | 3       | State specific objectives, including any prespecified hypotheses <b>p. 5 paragraph 1 and 2</b>                                                                                                                                                                                                                                                                                                                                                                                                                                          |
| <b>Methods</b>               |         |                                                                                                                                                                                                                                                                                                                                                                                                                                                                                                                                         |
| Study design                 | 4       | Present key elements of study design early in the paper <b>Method; paragraph 1</b>                                                                                                                                                                                                                                                                                                                                                                                                                                                      |
| Setting                      | 5       | Describe the setting, locations, and relevant dates, including periods of recruitment, exposure, follow-up, and data collection <b>Methods; paragraph 1-2, fig. 1</b>                                                                                                                                                                                                                                                                                                                                                                   |
| Participants                 | 6       | (a) Give the eligibility criteria, and the sources and methods of selection of participants. Describe methods of follow-up <b>Methods; paragraph 1-2, fig. 1</b><br>(b) For matched studies, give matching criteria and number of exposed and unexposed                                                                                                                                                                                                                                                                                 |
| Variables                    | 7       | Clearly define all outcomes, exposures, predictors, potential confounders, and effect modifiers. Give diagnostic criteria, if applicable <b>Methods; p. 6-7</b>                                                                                                                                                                                                                                                                                                                                                                         |
| Data sources/<br>measurement | 8*      | For each variable of interest, give sources of data and details of methods of assessment (measurement). Describe comparability of assessment methods if there is more than one group <b>Methods; p. 6-7</b>                                                                                                                                                                                                                                                                                                                             |
| Bias                         | 9       | Describe any efforts to address potential sources of bias <b>Methods; p.5 first paragraph – random selection, stratification for gender and residential area</b>                                                                                                                                                                                                                                                                                                                                                                        |
| Study size                   | 10      | Explain how the study size was arrived at <b>Methods; paragraph 1 and 2, p.5-6, fig.1</b>                                                                                                                                                                                                                                                                                                                                                                                                                                               |
| Quantitative variables       | 11      | Explain how quantitative variables were handled in the analyses. If applicable, describe which groupings were chosen and why <b>Methods; p.6-7, Appendix</b>                                                                                                                                                                                                                                                                                                                                                                            |
| Statistical methods          | 12      | (a) Describe all statistical methods, including those used to control for confounding <b>Statistical methods; p.8</b><br>(b) Describe any methods used to examine subgroups and interactions <b>Statistical methods; p.8</b><br>(c) Explain how missing data were addressed <b>Fig. 1, table 1 and 2</b><br>(d) If applicable, explain how loss to follow-up was addressed <b>Methods, Study design and source population and fig. 1</b><br>(e) Describe any sensitivity analyses <b>Methods; p.8 last part of Statistical methods.</b> |
| <b>Results</b>               |         |                                                                                                                                                                                                                                                                                                                                                                                                                                                                                                                                         |
| Participants                 | 13*     | (a) Report numbers of individuals at each stage of study—eg numbers potentially eligible, examined for eligibility, confirmed eligible, included in the study, completing follow-up, and analysed <b>Fig. 1, table 1 and 2</b><br>(b) Give reasons for non-participation at each stage – <b>no information on reason</b><br>(c) Consider use of a flow diagram <b>Fig. 1</b>                                                                                                                                                            |
| Descriptive data             | 14*     | (a) Give characteristics of study participants (eg demographic, clinical, social) and information on exposures and potential confounders <b>Table 1</b><br>(b) Indicate number of participants with missing data for each variable of interest                                                                                                                                                                                                                                                                                          |

**Table 1**

| <b>(e) Summarise follow-up time (eg, average and total amount)</b> |     |                                                                                                                                                                                                                                                                                                                                                                                                                                                                                                                                                                           |
|--------------------------------------------------------------------|-----|---------------------------------------------------------------------------------------------------------------------------------------------------------------------------------------------------------------------------------------------------------------------------------------------------------------------------------------------------------------------------------------------------------------------------------------------------------------------------------------------------------------------------------------------------------------------------|
| Outcome data                                                       | 15* | Report numbers of outcome events or summary measures over time <b>Table 2</b>                                                                                                                                                                                                                                                                                                                                                                                                                                                                                             |
| Main results                                                       | 16  | (a) Give unadjusted estimates and, if applicable, confounder-adjusted estimates and their precision (eg, 95% confidence interval). Make clear which confounders were adjusted for and why they were included <b>Table 2 and statistical methods</b><br>(b) Report category boundaries when continuous variables were categorized <b>Statistical methods; p. 8, Age categorised into 10 yr intervals. Results; table 1 and table 2.</b><br>(c) If relevant, consider translating estimates of relative risk into absolute risk for a meaningful time period <b>Table 2</b> |
| Other analyses                                                     | 17  | Report other analyses done—eg analyses of subgroups and interactions, and sensitivity analyses <b>Statistical methods; p.8. Results; p. 15. Trend test, effect measure modification and loss to follow-up.</b>                                                                                                                                                                                                                                                                                                                                                            |
| <b>Discussion</b>                                                  |     |                                                                                                                                                                                                                                                                                                                                                                                                                                                                                                                                                                           |
| Key results                                                        | 18  | Summarise key results with reference to study objectives <b>Discussion; first paragraph</b>                                                                                                                                                                                                                                                                                                                                                                                                                                                                               |
| Limitations                                                        | 19  | Discuss limitations of the study, taking into account sources of potential bias or imprecision. Discuss both direction and magnitude of any potential bias <b>p. 17 last paragraph.</b>                                                                                                                                                                                                                                                                                                                                                                                   |
| Interpretation                                                     | 20  | Give a cautious overall interpretation of results considering objectives, limitations, multiplicity of analyses, results from similar studies, and other relevant evidence <b>Discussion; last paragraph p. 17 and first paragraph p 18.</b>                                                                                                                                                                                                                                                                                                                              |
| Generalisability                                                   | 21  | Discuss the generalisability (external validity) of the study results <b>Discussion; last paragraph.</b>                                                                                                                                                                                                                                                                                                                                                                                                                                                                  |
| <b>Other information</b>                                           |     |                                                                                                                                                                                                                                                                                                                                                                                                                                                                                                                                                                           |
| Funding                                                            | 22  | Give the source of funding and the role of the funders for the present study and, if applicable, for the original study on which the present article is based <b>Funding and Competing interests p. 18 - 19.</b>                                                                                                                                                                                                                                                                                                                                                          |

\*Give information separately for exposed and unexposed groups.

**Note:** An Explanation and Elaboration article discusses each checklist item and gives methodological background and published examples of transparent reporting. The STROBE checklist is best used in conjunction with this article (freely available on the Web sites of PLoS Medicine at <http://www.plosmedicine.org/>, Annals of Internal Medicine at <http://www.annals.org/>, and Epidemiology at <http://www.epidem.com/>). Information on the STROBE Initiative is available at <http://www.strobe-statement.org>.

1  
2  
3  
4  
5 **Does healthy lifestyle behaviour influence the prognosis of low back pain**  
6  
7 **among men and women in a general population? A population based cohort**  
8 **study.**  
9

10  
11  
12 Tony Bohman, PhD,<sup>1</sup> Lars Alfredsson, professor,<sup>1,2</sup> Irene Jensen, professor,<sup>1</sup> Johan Hallqvist,  
13 professor,<sup>3,4</sup> Eva Vingård, professor,<sup>5</sup> Eva Skillgate, principal,<sup>1,6</sup>  
14  
15

16  
17 <sup>1</sup> Institute of Environmental Medicine, Karolinska Institutet, Box 210, SE-17177 Stockholm, Sweden,  
18

19 <sup>2</sup> Centre for Occupational and Environmental Medicine, Stockholm County Council, Norrbacka, SE-  
20

21 171 76 Stockholm, Sweden, <sup>3</sup> Department of Public Health Sciences, Karolinska  
22

23 Universitetssjukhuset, SE-17176 Stockholm, Sweden, <sup>4</sup> Department of Public Health and Caring  
24

25 Sciences, Uppsala University, Box 564, SE-75122 Uppsala, Sweden, <sup>5</sup> Department of Medical  
26

27 Science, Uppsala University, SE-75185 Uppsala, Sweden, <sup>6</sup> Scandinavian College of Naprapathic  
28

29 Manual Medicine, Kräftriket 23A, SE-11419 Stockholm, Sweden  
30  
31

32  
33 Corresponding author:

34 Tony Bohman, Institute of Environmental Medicine, Karolinska Institutet, Box 210, SE-17177  
35

36 Stockholm, Sweden  
37

38 e-mail; tony.bohman@ki.se, cellphone; +46 70 299 62 63  
39  
40

41  
42 Key words: back pain, epidemiology, life style, cohort studies, public health  
43

44 Word count: 3392  
45

46 Figures: 3  
47

48 Tables: 2  
49

50 References: 41  
51

52 Supplementary files: 2  
53  
54  
55  
56  
57  
58  
59  
60

## Abstract

### Objectives

To study the influence of healthy lifestyle behaviour on the prognosis of occasional low back pain among men and women in a general population.

### Design

Cohort study with a four year follow-up.

### Settings

General population in Stockholm County, Sweden.

### Participants

The study sample comprised 3938 men and 5056 women, aged 18-84, from the Stockholm Public Health cohort reporting occasional low back pain in the baseline questionnaire 2006.

### Measures

Lifestyle factors and potential confounders were assessed at baseline. The lifestyle factors smoking habits, alcohol consumption, leisure physical activity and consumption of fruit and vegetables, were dichotomized using recommendations for a health-enhancing lifestyle and combined to form the exposure variable “healthy lifestyle behaviour”. The exposure was categorised into five levels according to the number of healthy lifestyle factors met. The follow-up questionnaire in 2010 gave information about the outcome, long duration troublesome low back pain. Crude and adjusted binomial regression models were applied to estimate the association between the exposure and the outcome analysing men and women separately.

### Results

The risk of developing long duration troublesome low back pain among women with occasional low back pain decreased with increasing healthy lifestyle behaviour (trend test:  $p=0.006$ ). 21% (28/131) among women with no healthy lifestyle factor (reference) experienced the outcome compared to nine



## Introduction

Lifestyle factors such as non-smoking, physical activity, healthy diet and moderate alcohol use seem to influence the risk and the prognosis in several diseases (e.g. cancer, type 2 diabetes mellitus, and cardiovascular disease) as well as mortality, especially when the factors are combined.[1-5]

Low back pain (LBP) is one of the most common health problems worldwide and comprises a large burden on individuals as well as on society.[6, 7] When estimating the global prevalence of activity-limiting LBP using 165 studies from 54 countries, Hoy and colleagues found the mean point- and 1 month prevalence to be  $11.9 \pm 2.0\%$  and  $23.2 \pm 2.9\%$  respectively.[6] Current knowledge of prognostic factors, e.g. lifestyle factors, for LBP is limited and the above mentioned facts support the need for more research on this topic.

In a “review of reviews” from 2009, Hayden and colleagues reported older age, negative cognitive characteristics, poor general health, increased psychological or psychosocial stress, poor relations with colleagues, physically heavy work, functional disability, sciatica, and the presence of worker’s compensation to be associated with poor outcomes of acute and sub-acute LBP.[8] Another 2009 review found recovery expectations to be associated with activity limitations or participation restrictions (e.g. return to work) in persons with non-chronic non-specific LBP.[9] In the review by Hayden and colleagues smoking was the only lifestyle factor included and found, by two studies, to have no association with poor outcomes of acute and sub-acute LBP.[8] Similarly, a recent review studying prognostic factors for recovery from chronic LBP found no association between smoking and the outcome pain and disability.[10] Moreover, reviewing observational studies on LBP patients Hendrick and colleagues found moderate evidence for sports, leisure and occupational physical activity not to be associated with LBP outcomes.[11]

Women seem to have higher prevalence, be more severely affected and have worse prognosis of LBP than men and some studies suggest that men and women should be assessed separately when studying risk and prognostic factors for LBP.[6, 12-14]

To our knowledge, it is not known if healthy lifestyle behavior, defined by a combination of lifestyle factors, is associated with the prognosis of LBP. Healthy lifestyle behaviour seems to have a larger



1  
2  
3 potential to affect health problems and mortality than separate lifestyle factors alone.[1-5] We  
4  
5 hypothesized that healthy lifestyle behaviour would decrease the risk of a poor outcome among men  
6  
7 and women with occasional low back pain. If healthy lifestyle behaviour affects the prognosis of LBP  
8  
9 implementing this knowledge could potentially prevent transition into disabling LBP and thereby  
10  
11 reduce the burden on the individual as well as on the society.

12  
13 The aim of this study was to explore the influence of healthy lifestyle behaviour on the prognosis of  
14  
15 occasional low back pain among men and women in a general population, hypothesizing that healthy  
16  
17 lifestyle behaviour can improve the prognosis.  
18  
19

## 20 21 **Methods**

### 22 23 **Study design and source population**

24  
25 In this study we used data from the Stockholm Public Health Cohort (SPHC).[15] The SPHC was set  
26  
27 up by the Stockholm County Council and administered by Statistics Sweden and the Department of  
28  
29 Public Health Sciences at Karolinska Institutet, Stockholm. The SPHC is a population based cohort  
30  
31 established within the framework of Stockholm County Council public health surveys. In 2006,  
32  
33 Stockholm County had an adult population of approximately 1.4 million individuals. From this  
34  
35 population a total of 56 634 individuals (18-84 years old) were randomly selected, after stratification  
36  
37 for gender and residential area, and received the baseline questionnaire, which 34 707 (61%)  
38  
39 answered. The responders received a follow-up questionnaire in 2010, answered by 25 167  
40  
41 participants (73%). Compared to consensus data from Stockholm County the SPHC participants were  
42  
43 more likely to be of female gender, be born in Sweden, have higher education and income and be more  
44  
45 than 45 years old.[15]  
46  
47  
48

### 49 50 **Study sample**

51  
52 The study sample (n=8994) consisted of participants reporting occasional LBP at baseline in 2006 who  
53  
54 answered the follow-up questionnaire in 2010 and provided complete information on outcome and  
55  
56 exposure variables (Figure 1). Occasional LBP at baseline was defined as reporting having had LBP,  
57  
58  
59  
60

1  
2  
3 on average, up to a few days per month during the past 6 months (for the item used to define  
4 occasional LBP see Appendix 1). The information was based on a modified version of a question from  
5 the Standardized Nordic Questionnaire.[16]  
6  
7

## 8 9 10 **Data collection and variables**

11 The baseline and the follow-up questionnaires comprised self-reported information on lifestyle,  
12 demographic- and socioeconomic characteristics, physical and psychological health and work related  
13 factors. The self-reported data were supplemented with information from regional and national  
14 registers.[15] Four reminders were sent after the baseline questionnaire and three reminders after the  
15 follow-up questionnaire.  
16  
17  
18  
19  
20  
21

### 22 23 **Exposure: healthy lifestyle behaviour (HLB)**

24 Using baseline information we constructed four binary healthy lifestyle factors where cut-offs  
25 (healthy/not healthy) were set in accordance with recommendations for a health-enhancing lifestyle  
26 made by Swedish authorities and WHO.[17-20] The exposure variable “healthy lifestyle behaviour”  
27 (HLB) was a combination of these binary factors and was categorised into five levels according to the  
28 number of healthy lifestyle factors included, i.e. from none to four (HLB0 to HLB4). A healthy  
29 lifestyle behaviour with regard to each of the considered healthy factors was defined by: non-smoking,  
30 no risk consumption of alcohol ( $\leq 168$  g 100% alcohol/week for men and  $\leq 108$  g 100% alcohol/week  
31 for women, and consuming alcohol corresponding to about half a bottle of spirits (35 cl) on the same  
32 occasion less than once a month), recommended level of leisure physical activity (at least 150 minutes  
33 at moderate intensity or 75 minutes at high intensity per week or a combination of these activities),  
34 and recommended consumption of fruit and vegetables ( $\geq$  a total of 4 servings of fruit and  
35 vegetables/day, equal to about 400 g/day) (see Appendix 2 for a description of the questions and how  
36 the variables were constructed).  
37  
38  
39  
40  
41  
42  
43  
44  
45  
46  
47  
48  
49  
50  
51

### 52 53 **Outcome variable: long duration troublesome low back pain (LTLBP)**

54 Information on the outcome LTLBP was collected from the follow-up questionnaire in 2010 and  
55 defined as having had LBP that decreased workability or interfered with other daily activities to some  
56  
57  
58  
59  
60

1  
2  
3 or to high degree, on average a few days per week or more often during the past 6 months (for the  
4 items used to define LTLBP see Appendix 1). The question used to measure LTLBP was modified  
5 from the Standardized Nordic Questionnaire and incorporated a dimension of disability suggested to  
6 be of importance when defining LBP.[16, 21]  
7  
8  
9

## 10 11 Potential confounding factors

12  
13  
14 Potential confounders were chosen based on theoretic and empirical relevance, information from  
15 literature regarding the prognosis of spinal pain and availability in the questionnaire.[8, 22, 23] The  
16 following factors were considered: long-term illness (suffering from long-term illness, health problems  
17 following an accident, disability or other persistent health problems), neck pain and pain from hip,  
18 thigh or knee during the past 6 months (5 answer alternatives from “no pain” to “daily pain”),  
19 suffering from headache or migraine (“no”, “somewhat”, “severe”), rheumatoid arthritis diagnosed by  
20 a physician, living alone, living with children (children of all ages included) and hours of sleep a  
21 typical night during the workweek (dichotomized into “good sleep”: 6-8 h and “poor sleep”: <6 h or  
22 >8 h). The questionnaire also included the 12-item General Health Questionnaire were a sum score of  
23  $\geq 3$  (using the recommended 0-0-1-1 scoring on the four answer alternatives) was used to assess  
24 psychological distress.[24, 25] The frequency of stress was measured by the question “How often do  
25 you feel stress?” with 5 answer alternatives from “never” to “most of the week”. Personal support  
26 (having persons who can give support in handling personal problems or critical life events) was  
27 measured using a question from the Social Support-13 instrument (SS-13).[26] Furthermore, financial  
28 stress was assessed by the question “Did it during the previous 12 months happen that you ran out of  
29 money and had to borrow from relatives and friends to be able to pay for food or rent?” (“no”, “yes, on  
30 one occasion”, “yes, on several occasions”). A Swedish national register supplied information on civil  
31 status (married, unmarried, divorced, widow/widower), country of birth (Sweden, Nordic countries  
32 and Europe, outside Europe), socio-economic status (SES), annual individual disposable income  
33 (grouped in quintiles) and education.[27, 28] The level of education was categorized into, low (only  
34 compulsory education and vocational training), intermediate (secondary school) and high (university  
35 studies).  
36  
37  
38  
39  
40  
41  
42  
43  
44  
45  
46  
47  
48  
49  
50  
51  
52  
53  
54  
55  
56  
57  
58  
59  
60

## Statistical methods

We used generalized linear models with a binomial distribution to estimate the association between the exposure and the outcome analysing men and women separately. To determine the role of a potential confounding factor we included them, one at a time, into the crude model. Only factors that changed the estimated risk ratio (RR) by 10% or more were entered into the final model.[29-33] All final models were adjusted for age categorized into 10 year intervals. Age was categorized as it showed non-linearity with the outcome. We calculated relative risks (RR), using the log function, as well as risk differences (RD), using the identity function, with 95% confidence intervals (95% CI). A likelihood ratio test was used to assess clinically relevant effect measure modification between the exposure and possible confounders (age, education, SES, neck pain, long term illness and psychological distress) as well as between confounders included in the adjusted models (age and SES).[34] An effect measure modification significant at  $p \leq 0.05$  was included in further analyses. [34] We used Wald test to evaluate potential trends in the associations between the exposure and the outcome, and a Chi-square test to assess if the overall adjusted risk differed between men and women.[34] The effect of attrition was assessed, using Chi-square tests, by comparing the distribution of the four healthy lifestyle factors included in the exposure, healthy lifestyle behaviour, in subjects who were lost to follow-up to the distribution in the study sample. All p-values were two-sided, and analyses were completed using SAS® version 9.3 and STATA/IC® version 12.1.

## Results

### Baseline characteristics

The study sample (n=8994) consisted of 56% women. Participants were predominately middle aged, well educated, and born in Sweden. At baseline in 2006, about 15% of the participants were 65 years or older (men 17% and women 14%). Furthermore the majority were cohabitating, and about 35% had children living at home (Table 1). About three percent men and 10% women had an “optimal healthy lifestyle” (HLB4) whereas about five percent men and three percent women had an “unhealthy

1  
2  
3 lifestyle" (HLB0). Healthy lifestyle behaviour improved with increased level of education.

4  
5 Participants being married or having children living at home had a high proportion of healthy lifestyle  
6  
7 behaviour while participants living alone, being psychologically distressed and financially stressed  
8  
9 showed low proportions of healthy lifestyle behaviour (Table 1).

10  
11 The other baseline variables assessed did not differ much between the categories of HLB, neither  
12  
13 among men nor among women.

14  
15  
16  
17  
18  
19  
20  
21  
22  
23  
24  
25  
26  
27  
28  
29  
30  
31  
32  
33  
34  
35  
36  
37  
38  
39  
40  
41  
42  
43  
44  
45  
46  
47  
48  
49  
50  
51  
52  
53  
54  
55  
56  
57  
58  
59  
60

For peer review only

Table 1. Baseline characteristics by categories of the exposure healthy lifestyle behaviour (HLB0 - HLB4)\* (n = 8994).

| Baseline characteristics       | Men          |              |              |               |              |              | Women        |              |              |               |               |              | Internal drop-out M/W (n) |
|--------------------------------|--------------|--------------|--------------|---------------|--------------|--------------|--------------|--------------|--------------|---------------|---------------|--------------|---------------------------|
|                                | All (n=3938) | HLB0 (n=181) | HLB1 (n=958) | HLB2 (n=1747) | HLB3 (n=936) | HLB4 (n=116) | All (n=5056) | HLB0 (n=174) | HLB1 (n=897) | HLB2 (n=2080) | HLB3 (n=1416) | HLB4 (n=489) |                           |
| Proportion of study sample (%) | 44           |              |              |               |              |              | 56           |              |              |               |               |              |                           |
| Mean age, years (SD)           | 50(15)       | 49(14)       | 48(15)       | 49(15)        | 51(15)       | 50(14)       | 46(16)       | 43(17)       | 47(15)       | 46(16)        | 47(15)        | 46(14)       | 0/0                       |
| <b>Education</b>               |              |              |              |               |              |              |              |              |              |               |               |              | 234/287                   |
| Low                            | 16           | 30           | 19           | 14            | 14           | 8            | 14           | 22           | 17           | 13            | 12            | 9            |                           |
| Intermediate                   | 43           | 43           | 46           | 44            | 40           | 35           | 41           | 57           | 46           | 42            | 38            | 34           |                           |
| High                           | 41           | 27           | 35           | 42            | 46           | 57           | 45           | 21           | 37           | 45            | 50            | 57           |                           |
| <b>Civil status</b>            |              |              |              |               |              |              |              |              |              |               |               |              | 0/1                       |
| Married                        | 54           | 42           | 49           | 56            | 56           | 65           | 47           | 27           | 41           | 46            | 53            | 53           |                           |
| Unmarried                      | 33           | 38           | 36           | 32            | 31           | 29           | 36           | 49           | 37           | 37            | 33            | 32           |                           |
| Divorced/Widow/Widower         | 13           | 20           | 15           | 12            | 13           | 6            | 17           | 24           | 22           | 17            | 14            | 15           |                           |
| <b>SES<sup>a</sup></b>         |              |              |              |               |              |              |              |              |              |               |               |              | 292/398                   |
| Unskilled/semiskilled worker   | 14           | 22           | 17           | 13            | 12           | 9            | 16           | 23           | 19           | 16            | 14            | 10           |                           |
| Skilled worker                 | 15           | 25           | 16           | 14            | 15           | 8            | 10           | 22           | 12           | 9             | 9             | 11           |                           |
| Assistant non-manual employees | 8            | 8            | 10           | 9             | 7            | 5            | 20           | 22           | 21           | 22            | 18            | 15           |                           |
| Intermediate non-manual        | 25           | 14           | 25           | 24            | 27           | 24           | 29           | 23           | 23           | 29            | 31            | 35           |                           |

1  
2  
3  
4  
5  
6  
7  
8  
9  
10  
11  
12  
13  
14  
15  
16  
17  
18  
19  
20  
21  
22  
23  
24  
25  
26  
27  
28  
29  
30  
31  
32  
33  
34  
35  
36  
37  
38  
39  
40  
41  
42  
43  
44  
45  
46  
47  
48  
49

|                                             |    |    |    |    |    |    |    |    |    |    |    |    |       |
|---------------------------------------------|----|----|----|----|----|----|----|----|----|----|----|----|-------|
| employees                                   |    |    |    |    |    |    |    |    |    |    |    |    |       |
| Employed/self-employed                      | 25 | 17 | 18 | 28 | 28 | 34 | 19 | 7  | 17 | 18 | 21 | 24 |       |
| professionals                               |    |    |    |    |    |    |    |    |    |    |    |    |       |
| Self-employed<br>(other than professionals) | 13 | 14 | 14 | 12 | 11 | 20 | 6  | 3  | 8  | 6  | 7  | 5  |       |
| <b>Poor sleep<sup>b</sup></b>               |    |    |    |    |    |    |    |    |    |    |    |    | 34/27 |
| <6 or >8 hours/night                        | 9  | 17 | 9  | 10 | 7  | 9  | 10 | 14 | 11 | 11 | 9  | 7  |       |
| <b>Living alone</b>                         | 17 | 31 | 19 | 16 | 14 | 9  | 19 | 24 | 21 | 19 | 17 | 17 | 10/16 |
| <b>Living with children</b>                 | 34 | 24 | 31 | 35 | 34 | 42 | 38 | 27 | 32 | 39 | 41 | 41 | 10/16 |
| <b>Psychological distress<sup>c</sup></b>   | 13 | 18 | 15 | 13 | 11 | 5  | 21 | 33 | 23 | 22 | 19 | 17 | 38/37 |
| <b>Financial stress<sup>d</sup></b>         | 7  | 15 | 10 | 5  | 4  | 3  | 9  | 23 | 13 | 9  | 7  | 6  | 17/24 |

\* HLB0 = no healthy lifestyle factor, HLB1 = 1 of 4 healthy lifestyle factors, HLB2 = 2 of 4 factors, HLB3 = 3 of 4 factors, HLB4 = all 4 healthy lifestyle factors.

<sup>a</sup> Socio-economic status. For the economically active population SES was based on current occupation and education. For the non-active population SES was based on previous occupation, current education or the occupation of spouses.

<sup>b</sup> Hours of sleep a typical night during the workweek (dichotomized into “good sleep”: 6-8 h and “poor sleep”: <6 h or >8 h).

<sup>c</sup> From the 12-item General Health Questionnaire (GHQ-12) were a sum score  $\geq 3$  was used to asses psychological stress.

<sup>d</sup> Financial stress: Had to borrow money from relatives and friends to be able to pay for food or rent on several occasions during the previous 12 months.

1  
2  
3 The majority of both men and women were non-smokers and did not exceed risk consumption of  
4 alcohol. About 40% of both men and women reached recommended levels of leisure physical activity  
5 while 26% of the women consumed recommended levels of fruit and vegetables compared to seven  
6 percent for men (Figure 2).  
7  
8  
9

## 10 11 **Outcome**

12  
13  
14 At follow-up in 2010, nine percent men and 11% women in the study sample reported LTLBP. Table  
15  
16 2 shows the crude and adjusted binomial regression estimations of the association between healthy  
17  
18 lifestyle behaviour and the outcome.  
19  
20  
21  
22  
23  
24  
25  
26  
27  
28  
29  
30  
31  
32  
33  
34  
35  
36  
37  
38  
39  
40  
41  
42  
43  
44  
45  
46  
47  
48  
49  
50  
51  
52  
53  
54  
55  
56  
57  
58  
59  
60



1  
2  
3  
4  
5  
6  
7  
8  
9  
10  
11  
12  
13  
14  
15  
16  
17  
18  
19  
20  
21  
22  
23  
24  
25  
26  
27  
28  
29  
30  
31  
32  
33  
34  
35  
36  
37  
38  
39  
40  
41  
42  
43  
44  
45  
46  
47  
48  
49

Table 2. Association\* between healthy lifestyle behaviour and long duration troublesome low back pain (LTLBP) in men and women with occasional LBP at baseline in 2006.

|             | MEN<br>(n=3646) <sup>a</sup>             |                                          |                      |                                     |                | WOMEN<br>(n=4658) <sup>a</sup>  |                      |                                     |                |
|-------------|------------------------------------------|------------------------------------------|----------------------|-------------------------------------|----------------|---------------------------------|----------------------|-------------------------------------|----------------|
|             | Healthy lifestyle behaviour <sup>c</sup> | LTLBP/<br>no LTLBP <sup>d</sup><br>(n/n) | Crude                | Adjusted<br>(Age, SES) <sup>b</sup> |                | LTLBP/<br>no LTLBP <sup>d</sup> | Crude                | Adjusted<br>(Age, SES) <sup>b</sup> |                |
|             |                                          |                                          | RR<br>(95% CI)       | RR<br>(95% CI)                      | RD<br>(95% CI) |                                 | RR<br>(95% CI)       | RR<br>(95% CI)                      | RD<br>(95% CI) |
| <b>HLB0</b> | 14/155                                   | 1.0                                      | 1.0                  | 0.0                                 | 28/131         | 1.0                             | 1.0                  | 0.0                                 |                |
| <b>HLB1</b> | 71/812                                   | 0.97<br>(0.56, 1.68)                     | 1.02<br>(0.59, 1.76) | -0.01<br>(-0.06, 0.03)              | 94/735         | 0.64<br>(0.44, 0.95)            | 0.65<br>(0.44, 0.96) | -0.05<br>(-0.12, 0.01)              |                |
| <b>HLB2</b> | 133/1476                                 | 1.00<br>(0.59, 1.69)                     | 1.05<br>(0.62, 1.78) | -0.01<br>(-0.05, 0.04)              | 181/1721       | 0.54<br>(0.38, 0.78)            | 0.54<br>(0.38, 0.78) | -0.07<br>(-0.13, -0.01)             |                |
| <b>HLB3</b> | 60/818                                   | 0.82                                     | 0.85                 | -0.02                               | 125/1187       | 0.54                            | 0.55                 | -0.07                               |                |

|             |       |              |              |               |        |              |              |                |
|-------------|-------|--------------|--------------|---------------|--------|--------------|--------------|----------------|
|             |       | (0.47, 1.44) | (0.48, 1.48) | (-0.06, 0.02) |        | (0.37, 0.79) | (0.38, 0.81) | (-0.13, -0.01) |
| <b>HLB4</b> | 6/101 | 0.68         | 0.75         | -0.03         | 36/420 | 0.45         | 0.48         | -0.08          |
|             |       | (0.27, 1.71) | (0.30, 1.89) | (-0.07, 0.01) |        | (0.28, 0.71) | (0.31, 0.77) | (-0.15, -0.02) |

\*note: Log- binomial regression estimating the risk ratio (RR) and the risk difference (RD) with 95% confidence interval (95% CI).

<sup>a</sup> Reduced number of observations due to missing information about socio-economic status (SES) (men n=292 and women n=398).

<sup>b</sup> Adjusted for age in 10 year categories and socio-economic status (SES) in six categories.

<sup>c</sup> HLB0 = no healthy lifestyle factor, HLB1 = 1 of 4 healthy lifestyle factors, HLB2 = 2 of 4 factors, HLB3 = 3 of 4 factors, HLB4 = all 4 healthy lifestyle factors.

Healthy lifestyle factors included in HLB: non-smoking, no risk consumption of alcohol ( $\leq 168$  g 100% alcohol/week for men and  $\leq 108$  g 100% alcohol/week for women, and consuming alcohol corresponding to  $\approx$  half a bottle of spirits on the same occasion less than once a month), recommended level of leisure physical activity (at least 150 minutes at moderate intensity or 75 minutes at high intensity per week or a combination of these activities), and recommended consumption of fruit and vegetables ( $\geq 4$  servings of fruit and vegetables/day).

<sup>d</sup> Numbers of participants with and without LTLBP at follow-up in 2010.

1  
2  
3 There was a decreased risk for LTLBP at follow-up for women with a healthy lifestyle behaviour  
4 compared to women with unhealthy lifestyle behaviour (test for trend:  $p=0.006$ ). Twenty-one percent  
5 of women with no healthy lifestyle factor (HLB0) experienced LTLBP at follow-up compared to nine  
6  
7 percent of women with all four factors (HLB4). A five percent lower proportion of women with one  
8  
9 percent of women with all four factors (HLB4). A five percent lower proportion of women with one  
10  
11 healthy lifestyle factor, and an eight percent lower proportion of women with all four factors had  
12  
13 LTLBP, in comparison to the reference group (HLB0). Women with one healthy lifestyle factor and  
14  
15 women with all four healthy lifestyle factors had a 35% and a 52% lower risk for LTLBP,  
16  
17 respectively, compared to women with unhealthy lifestyle behaviour (HLB0). There were no clear  
18  
19 associations between healthy lifestyle behaviour and LTLBP found among men.

20  
21 SES was the only variable found to be a confounder, so the final log-binomial analyses were adjusted  
22  
23 by SES and age in 10 year categories. There was no clinically relevant effect measure modifications  
24  
25 found.

26  
27  
28 Figure 3 shows the adjusted risk to develop LTLBP for men and women with occasional LBP by  
29  
30 categories of healthy lifestyle behaviour. Women had an overall higher adjusted risk for LTLBP than  
31  
32 men ( $p=0.001$ ).

33  
34  
35 The subjects lost to follow-up ( $n=4552$ ) had significantly lower proportions of healthy lifestyle factors  
36  
37 than the study sample ( $p < 0.01$  for all four factors). The differences in proportions were eight percent  
38  
39 for non-smoking, 16% for no risk consumption of alcohol, six percent for leisure physical activity and  
40  
41 five percent for consumption of fruit and vegetables.

## 42 43 44 45 **Discussion**

46  
47 In this cohort study we found that healthy lifestyle behaviour had a positive influence on the prognosis  
48  
49 of occasional low back pain among women. Healthy lifestyle behaviour comprised four healthy  
50  
51 lifestyle factors: non-smoking, no risk consumption of alcohol, recommended level of leisure physical  
52  
53 activity and recommended consumption of fruit and vegetables. Compared to women with no healthy  
54  
55 lifestyle factor, the risk for development of long duration troublesome low back pain (LTLBP)  
56  
57 decreased by 35% among women with one healthy lifestyle factor and by 52% among women with all  
58  
59  
60

1  
2  
3 four healthy lifestyle factors. In absolute terms, the proportion of women with LTLBP at follow-up  
4 was five percent lower if they had one healthy lifestyle factor and eight percent lower if they had four  
5 healthy lifestyle factors when compared to women with unhealthy lifestyle behaviour. These  
6  
7 associations were not confirmed among men but the results indicated the same tendency.  
8  
9

10  
11 Further, compared to women, men had an overall lower adjusted risk for LTLBP, and a low risk even  
12 in the unhealthy reference group (Figure 3). Men with unhealthy lifestyle behaviour had about the  
13 same risk for LTLBP as women with optimal healthy lifestyle behaviour. These findings were not  
14 aimed to be addressed in the present study and needs to be further investigated.  
15  
16  
17  
18

19  
20 We found no studies concerning the effects of healthy lifestyle behaviour, defined as a combination of  
21 healthy lifestyle factors, on the prognosis of LBP or other types of spinal pain. Nevertheless,  
22 considering the risk of developing chronic back pain Pronk and colleagues showed results in line with  
23 our study.[2] Studying employees, the authors found that an “optimal lifestyle” decreased the 2-year  
24 risk of chronic LBP by 66% compared to employees with an unhealthy lifestyle. Having optimal  
25 lifestyle was equal to having all four of the healthy lifestyle factors similar to the ones included in our  
26 study: non-smoking, adequate physical activity, five servings of fruit and vegetables per day and  
27 limited or no alcohol consumption.  
28  
29  
30  
31  
32  
33  
34  
35  
36

### 37 **Strengths and limitations**

38  
39 To our knowledge this is the first study concerning the influence of healthy lifestyle behaviour (HLB)  
40 on the prognosis of LBP assessing men and women separately. Measuring the exposure prior to the  
41 outcome and the dose-response relationship found supports the validity of the associations between  
42 HLB and LTLBP found among women.[32] We believe the use of a complete study sample, the large  
43 sample size and the large number of potential confounders assessed strengthens the internal validity,  
44 though we cannot rule out residual or unmeasured confounding, for example information on health  
45 care services.[32] The questions used in this study have, since 1975, been used in several Swedish  
46 national and local public health surveys. They have on several occasions been tested (e.g. cognitive  
47 testing) and improved by Statistics Sweden’s test centre and several questions have shown to have  
48  
49  
50  
51  
52  
53  
54  
55  
56  
57  
58  
59  
60

1  
2  
3 acceptable psychometric properties. Moreover, information on education, disposable income, SES,  
4 country of birth and marital status were collected from Swedish national registers known to have high  
5 quality. The questions concerning leisure physical activity and consumption of fruit and vegetables  
6 have shown to have acceptable validity and reliability, and the method to measure alcohol  
7 consumption has been recommended by Romelsjö and colleagues.[35-38] Despite this the  
8 measurements used may not have been optimal in terms of validity and reliability.

9  
10  
11 Our study also has limitations. Self-reported exposure information may be hampered by low accuracy.  
12 For example, some participants may wish to present themselves in a favourable light and overestimate  
13 their healthy lifestyle (social desirability) or some may have difficulties understanding the questions  
14 and therefore report less well.[32, 39, 40] This could lead to misclassification of the exposure which  
15 may result in an under- or overestimation of the association. As this potential misclassification is  
16 likely to be non-differential it would probably dilute a true association, at least when comparing  
17 extremes.[32] Moreover, if men tend to misclassify their healthy lifestyle factors to a greater extent  
18 than women this may partly explain why we did not find any associations among men. For example,  
19 Dyrstad and colleagues found that men overestimated their self-reported physical activity when  
20 compared to accelerometer-measures to a greater extent than women.[41] As we studied a population  
21 between 18-84 years old a large proportion of the participants did not provide work related  
22 information why we did not assess potential confounding effects from work related variables,  
23 something that may have affected the results. About 34% of participants in the baseline survey were  
24 not part of the study sample due to attrition and exclusion (Figure 1). Compared to the study sample  
25 the 34% missing had the same proportion of men and women, were younger (mean age for both sexes  
26 were 43 years) and both men and women had a slightly lower level of education as well as SES.  
27 Further, they had significantly lower proportions of healthy lifestyle factors than the study sample.  
28 This difference may have introduced selection bias to our results if the attrition and the loss to follow-  
29 up are related to the exposure as well as to the outcome. If selection bias is present, we believe that it  
30 probably leads to an underestimation of the associations, since these subjects to a higher extent may  
31 have developed LTLBP.

1  
2  
3 Considering strengths and limitations in our study we regard our result as a valid contribution to the  
4 body of research showing that a healthy lifestyle affects health problems.[1-5] Our study results  
5 showing that healthy lifestyle behaviour influences the prognosis of LBP are new and important  
6 knowledge with the potential to have an impact on a very common public health problem and have  
7 implications both in a public-health and a clinical perspective. Even though the association for healthy  
8 lifestyle behaviour to affect LBP among men was not clear, the results showed the same tendency as  
9 for women. Considering this together with the obvious effect of healthy lifestyle on other health  
10 problems the work to encourage both men and women to adapt to healthy lifestyle should certainly be  
11 continued.  
12  
13  
14  
15  
16  
17  
18  
19  
20  
21  
22

## 23 **Conclusion**

24  
25 Healthy lifestyle behaviour, defined as combinations of non-smoking, no risk consumption of alcohol,  
26 recommended level of leisure physical activity and recommended consumption of fruit and vegetables,  
27 seems to decrease the risk of developing long duration troublesome low back pain among women with  
28 occasional low back pain. There were no clear associations found among men.  
29  
30  
31  
32  
33  
34  
35  
36

37 **Contributors:** TB, ES, LA, EV and IJ contributed to the design of the study. JH and LA were part of  
38 the expert group responsible for the design and implementation of the SPHC cohort. TB made the  
39 statistical analyses and wrote the first manuscript version. All authors contributed to the interpretation  
40 of the data and critically revised all versions of the manuscript and finally approved the last version.  
41  
42  
43  
44

45 **Acknowledgements:** We would like to thank professor Matteo Bottai at the Institute of  
46 Environmental Medicine, Karolinska Institutet, for advice regarding the statistical analyses, and  
47 assistant professor Jill Hayden at the Faculty of Medicine, Dalhousie University, for valuable  
48 comments on the manuscript.  
49  
50  
51  
52  
53

54 **Funding:** The Stockholm County Council provided the financial support to form The Stockholm  
55 Public Health Cohort. TB had his salary provided by The Health Care Sciences Postgraduate School at  
56  
57  
58  
59  
60

1  
2  
3 Karolinska Institutet, Stockholm, Sweden. ES was financially supported by the AFA Insurance  
4 postdoc scholarship. Funders had no role in the collection, analyses or interpretation of the data, or in  
5 the writing of the article.  
6  
7

8  
9  
10 **Competing interests:** None declared.

11  
12 **Ethical approval:** The regional ethical review board in Stockholm, Sweden, approved the study  
13 (Diary nr. 2013/497-32).  
14

15  
16  
17 **Data sharing:** No additional data available.

18  
19  
20 **Transparency:** The lead author (TB) affirms that the manuscript is an honest, accurate, and  
21 transparent account of the study being reported; that no important aspects of the study have been  
22 omitted; and that any discrepancies from the study as planned have been explained.  
23  
24

## 25 26 27 28 **References**

- 29  
30 1. Ford ES, Bergman M. Healthy Living Is Best Revenge; Findings From the European  
31 Prospective Investigation Into Cancer and Nutrition - Postdam Study. Arch Intern Med  
32 2009;169(15):1355-62.  
33
- 34 2. Pronk NP, Lowry M, Kottke TE, *et al.* The association between optimal lifestyle adherence and  
35 short-term incidence of chronic conditions among employees. Popul Health Manag  
36 2010;13(6):289-95.  
37
- 38 3. Towfighi A, Markovic D, Ovbiagele B. Impact of a healthy lifestyle on all-cause and  
39 cardiovascular mortality after stroke in the USA. J Neurol Neurosurg Psychiatry  
40 2012;83(2):146-51.  
41
- 42 4. Ford ES, Bergmann MM, Boeing H, *et al.* Healthy lifestyle behaviors and all-cause mortality  
43 among adults in the United States. Prev Med 2012;55(1):23-7.  
44
- 45 5. Chow CK, Jolly S, Rao-Melacini P, *et al.* Association of diet, exercise, and smoking  
46 modification with risk of early cardiovascular events after acute coronary syndromes.  
47 Circulation 2010;121(6):750-8.  
48  
49  
50  
51  
52  
53  
54  
55  
56  
57  
58  
59  
60

- 1  
2  
3 6. Hoy D, Bain C, Williams G, *et al*. A systematic review of the global prevalence of low back  
4 pain. *Arthritis Rheum* 2012;64(6):2028-37.
- 5  
6  
7 7. Hoy D, Brooks P, Blyth F, *et al*. The Epidemiology of low back pain. *Best Pract Res Clin*  
8  
9  
10  
11  
12 8. Hayden JA, Chou R, Hogg-Johnson S, *et al*. Systematic reviews of low back pain prognosis had  
13  
14  
15  
16  
17  
18 9. Iles RA, Davidson M, Taylor NF, *et al*. Systematic review of the ability of recovery  
19  
20  
21  
22  
23  
24 10. Verkerk K, Luijsterburg PA, Miedema HS, *et al*. Prognostic factors for recovery in chronic  
25  
26  
27  
28  
29  
30  
31  
32  
33  
34 11. Hendrick P, Milosavljevic S, Hale L, *et al*. The relationship between physical activity and low  
35  
36  
37  
38  
39  
40  
41  
42  
43  
44 12. Messing K, Stock SR, Tissot F. Should studies of risk factors for musculoskeletal disorders be  
45  
46  
47  
48  
49  
50  
51  
52  
53  
54 13. Chenot JF, Becker A, Leonhardt C, *et al*. Sex differences in presentation, course, and  
55  
56  
57  
58  
59  
60 14. Bohman T, Alfredsson L, Hallqvist J, *et al*. The influence of self-reported leisure time physical  
activity and the body mass index on recovery from persistent back pain among men and women:  
a population-based cohort study. *BMC Public Health* 2013;13(1):385.
15. Svensson AC, Fredlund P, Laflamme L, *et al*. Cohort Profile: The Stockholm Public Health  
Cohort. *Int J Epidemiol* 2013;42(5):1263-72.
16. Kuorinka I, Jonsson B, Kilbom A, *et al*. Standardised Nordic questionnaires for the analysis of  
musculoskeletal symptoms. *Appl Ergon* 1987;18(3):233-7.



- 1  
2  
3 17. The National Board of Health and Welfare (Socialstyrelsen). Nationella riktlinjer för  
4 sjukdomsförebyggande metoder 2011 – stöd för styrning och ledning (National guidelines for  
5 disease prevention methods 2011). Stockholm, Sweden 2011; 16-17,  
6  
7 www.socialstyrelsen.se/publikationer2011/2011-11-11 (accessed Oct 2014).  
8  
9
- 10  
11 18. World Health Organisation (WHO). Diet, nutrition and the prevention of chronic diseases,  
12 Report of the joint WHO/FAO expert consultation. WHO Technical Report Series No. 916.  
13 Geneva, Switzerland 2003. www.who.int/dietphysicalactivity/publications/trs916/en/ (accessed  
14 Oct 2014).  
15  
16
- 17  
18 19. World Health Organisation (WHO). Global recommendations on physical activity for health.  
19 Geneva, Switzerland 2010. www.who.int/dietphysicalactivity/factsheet\_recommendations/en/  
20 (accessed Oct 2014).  
21  
22
- 23  
24 20. Andreasson S, Allebeck P. Alkohol och Hälsa. Swedish National Institute of Public Health  
25 (Statens Folkhälsoinstitut) r 2005:11. Stockholm, Sweden,  
26  
27 www.folkhalsomyndigheten.se/publicerat-material/publikationer/Alkohol-och-halsa/ (accessed  
28 Oct 2014).  
29  
30
- 31  
32 21. Dionne CE, Dunn KM, Croft PR, *et al.* A consensus approach toward the standardization of  
33 back pain definitions for use in prevalence studies. *Spine (Phila Pa 1976)* 2008;33(1):95-103.  
34  
35
- 36  
37 22. Palmlof L, Skillgate E, Alfredsson L, *et al.* Does income matter for troublesome neck pain? A  
38 population-based study on risk and prognosis. *J Epidemiol Community Health*  
39 2012;66(11):1063-70.  
40  
41
- 42  
43 23. Carroll LJ, Hogg-Johnson S, van der Velde G, *et al.* Course and prognostic factors for neck pain  
44 in the general population: results of the Bone and Joint Decade 2000-2010 Task Force on Neck  
45 Pain and Its Associated Disorders. *Spine* 2008;33(4 Suppl):S75-82.  
46  
47
- 48  
49 24. McDowell I. *Measuring health a guide to rating scales and questionnaires*. 3rd ed. Oxford  
50 University Press, 2006.  
51  
52
- 53  
54 25. Goldberg DP, Gater R, Sartorius N, *et al.* The validity of two versions of the GHQ in the WHO  
55 study of mental illness in general health care. *Psychol Med* 1997;27(1):191-7.  
56  
57  
58  
59  
60

- 1  
2  
3 26. Unden AL, Orth-Gomer K. Development of a social support instrument for use in population  
4 surveys. *Soc Sci Med* 1989;29(12):1387-92.  
5  
6  
7 27. Statistics Sweden. Socioekonomisk indelning (SEI) (Socio-economic classification system). In:  
8 Fastbom L. Meddelanden i samordningsfrågor för Sveriges officiella statistik (MIS), rep No.  
9 1982:4:6-8. Stockholm, 1984. [www.scb.se/sv/\\_/Hitta-statistik/Publiceringskalender/Visa-  
11 detaljerad-information/?PublObjId=6607](http://www.scb.se/sv/_/Hitta-statistik/Publiceringskalender/Visa-<br/>10 detaljerad-information/?PublObjId=6607) (accessed Oct 2014).  
12  
13 28. Statistics Sweden. Longitudinal Intergration data base for health insurance - and laubormarket  
14 studies (LISA). Secondary Longitudinal Intergration data base for health insurance - and  
15 laubormarket studies (LISA), 2009. [www.scb.se/lisa/](http://www.scb.se/lisa/) (accessed Oct 2014).  
16  
17 29. Carroll LJ, Hurwitz EL, Cote P, *et al.* Research priorities and methodological implications: the  
18 Bone and Joint Decade 2000-2010 Task Force on Neck Pain and Its Associated Disorders.  
19 *Spine* 2008;33(4 Suppl):S214-20.  
20  
21 30. Kurth T, Sonis J. Assessment and control of confounding in trauma research. *J Trauma Stress*  
22 2007;20(5):807-20.  
23  
24 31. Tong IS, Lu Y. Identification of confounders in the assessment of the relationship between lead  
25 exposure and child development. *Ann Epidemiol* 2001;11(1):38-45.  
26  
27 32. Rothman KJ, Greenland S, Lash TL. *Modern epidemiology*. 3rd ed. Wolters Kluwer  
28 Health/Lippincott Williams & Wilkins, 2008.  
29  
30 33. Mickey RM, Greenland S. The impact of confounder selection criteria on effect estimation. *Am*  
31 *J Epidemiol* 1989;129(1):125-37.  
32  
33 34. Hosmer DW, Lemeshow S. *Applied logistic regression*. 2nd ed. Wiley, 2000.  
34  
35 35. Orsini N, Bellocco R, Bottai M, *et al.* Validity of self-reported total physical activity  
36 questionnaire among older women. *Eur J Epidemiol* 2008;23(10):661-7.  
37  
38 36. Romelsjo A, Leifman H, Nystrom S. A comparative study of two methods for the measurement  
39 of alcohol consumption in the general population. *Int J Epidemiol* 1995;24(5):929-36.  
40  
41 37. Sepp H, Ekelund U, Becker W. Enkätfrågor om kost och fysisk aktivitet bland vuxna -  
42 Underlag till urval av frågor i befolkningsinriktade enkäter. Swedish National Food  
43 Administration, rep No. 21, 2004. [www.slv.se/sv/grupp1/Mat-och-naring/Matvanor---  
44  
45  
46  
47  
48  
49  
50  
51  
52  
53  
54  
55  
56  
57  
58  
59  
60](http://www.slv.se/sv/grupp1/Mat-och-naring/Matvanor---)

- undersokningar/Hur-undersoks-matvanor/Validerade-enkatfragor-om-kost-och-fysisk-aktivitet/  
(accessed Oct 2014).
38. Ekelund U, Sepp H, Brage S, *et al.* Criterion-related validity of the last 7-day, short form of the International Physical Activity Questionnaire in Swedish adults. *Public Health Nutrition* 2006;9(02):258-65.
39. Connor Gorber S, Schofield-Hurwitz S, Hardt J, *et al.* The accuracy of self-reported smoking: a systematic review of the relationship between self-reported and cotinine-assessed smoking status. *Nicotine Tob Res* 2009;11(1):12-24
40. Ainsworth BE, Levy SS. Methodological issues. In: Oja P, Borms J. *Health enhancing physical activity*. Meyer & Meyer Sport, 2004.
41. Dyrstad SM, Hansen BH, Holme IM, *et al.* Comparison of self-reported versus accelerometer-measured physical activity. *Med Sci Sports Exerc* 2014;46(1):99-106.

Figure 1. Flowchart of the inclusion process for the study sample. LBP: low back pain.

Figure 2. Distribution of healthy lifestyle factors. PA: Leisure physical activity. F/V: Fruit and vegetables.

Figure 3. Estimated risk for LTLBP, adjusted for SES and age. Men (n=3646), women (n=4658).

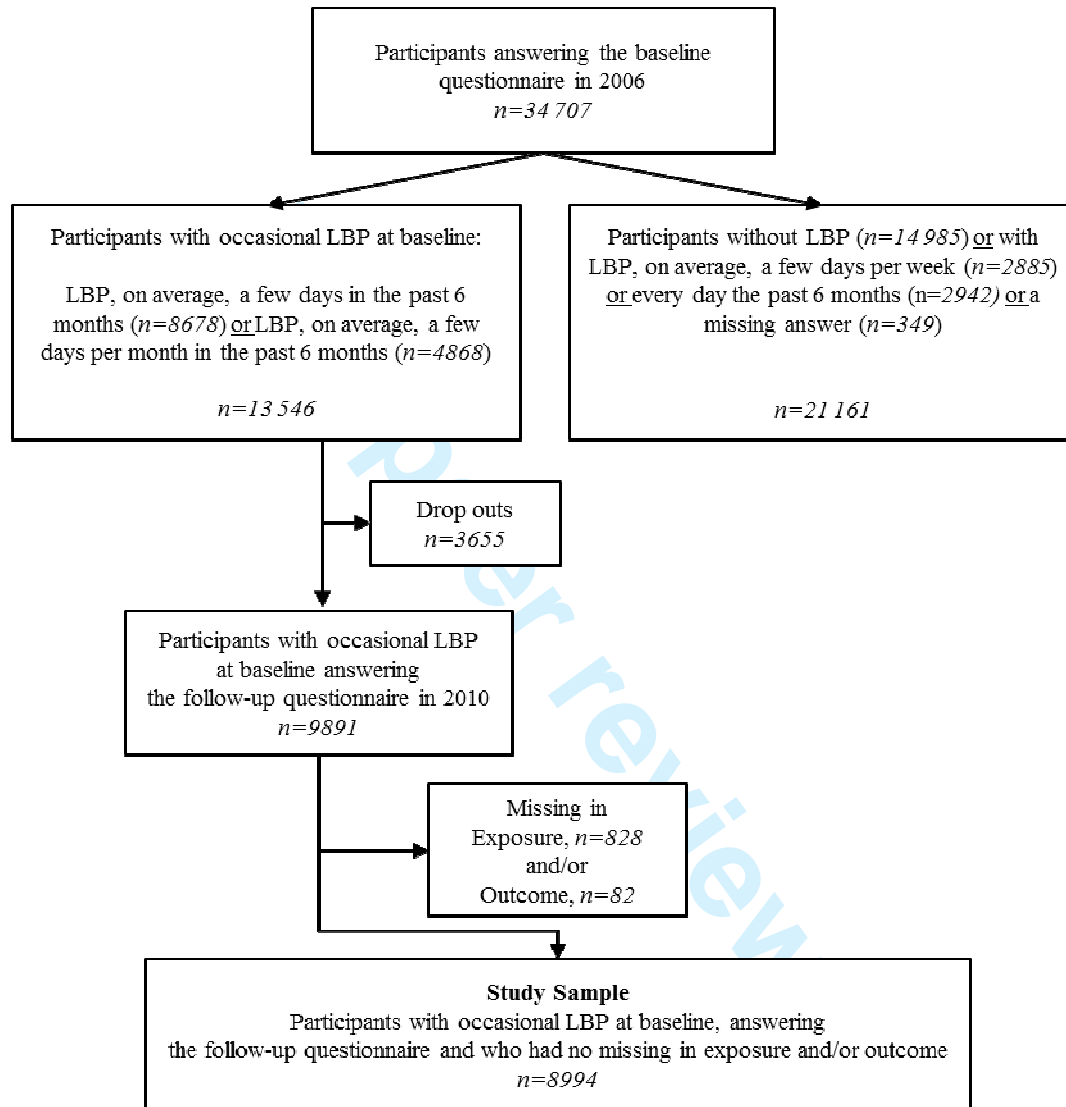

1  
2  
3  
4  
5  
6  
7  
8  
9  
10  
11  
12  
13  
14  
15  
16  
17  
18  
19  
20  
21  
22  
23  
24  
25  
26  
27  
28  
29  
30  
31  
32  
33  
34  
35  
36  
37  
38  
39  
40  
41  
42  
43  
44  
45  
46  
47  
48  
49  
50  
51  
52  
53  
54  
55  
56  
57  
58  
59  
60

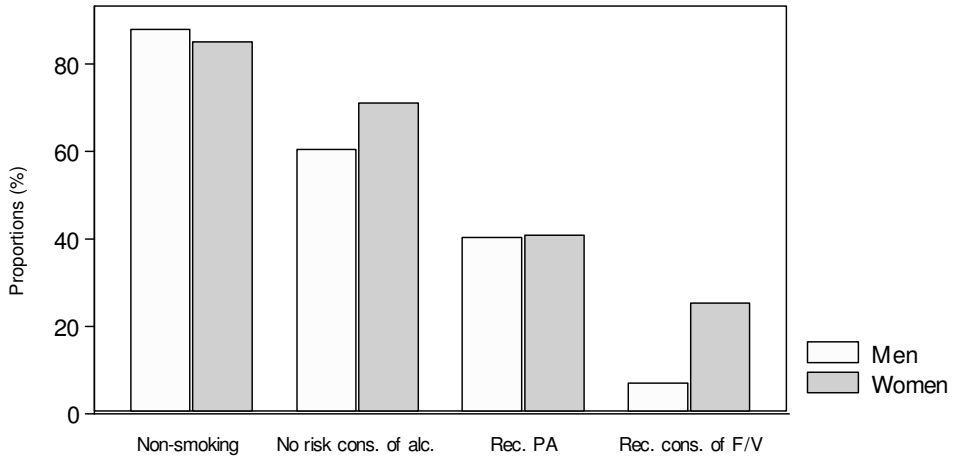

review only

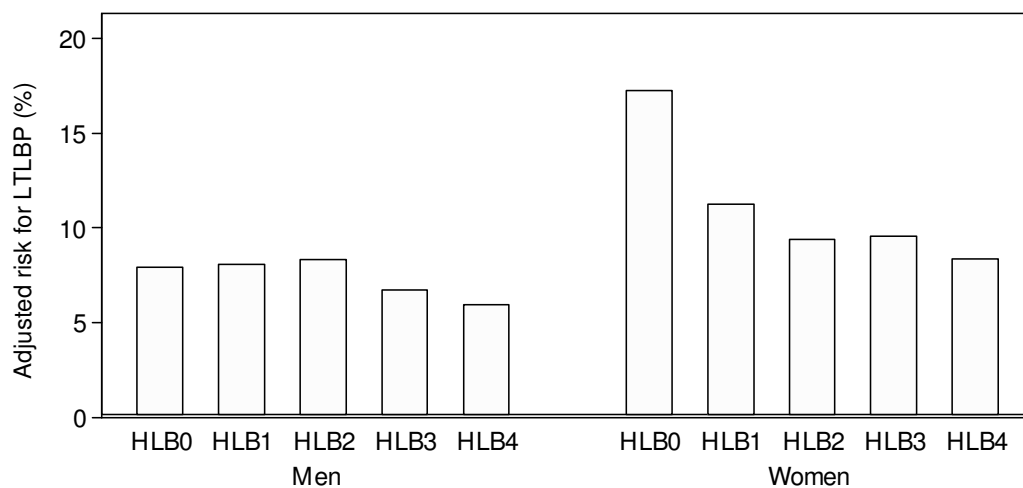

For peer review only

1  
2  
3  
4  
5  
6  
7  
8  
9  
10  
11  
12  
13  
14  
15  
16  
17  
18  
19  
20  
21  
22  
23  
24  
25  
26  
27  
28  
29  
30  
31  
32  
33  
34  
35  
36  
37  
38  
39  
40  
41  
42  
43  
44  
45  
46  
47  
48  
49  
50  
51  
52  
53  
54  
55  
56  
57  
58  
59  
60

## Appendix 1

Item in the baseline questionnaire in 2006 used to define individuals with occasional low back pain forming the study sample:

Have you had any pain in your lower back in the past 6 months?

If you have experienced pain on several occasions, try to estimate an average and put an X in the most appropriate box.

1.  No
2.  Yes, a few days in the past six months
3.  Yes, a few days per month
4.  Yes, a few days per week
5.  Yes, every day

Included in the study sample were individuals answering; Yes, a few days in the past six months *OR* Yes, a few days per month.

Items in the follow-up questionnaire in 2010 used to define the outcome long duration troublesome low back pain (LTLBP):

a) Have you had pain in your lower back in the past 6 months?

If you have experienced pain on several occasions, try to estimate an average and put an X in the most appropriate box.

- No
- Yes, a few days per month or more seldom
- Yes, a few days per week or more often

*If Yes;*

b) Have these problems decreased your workability or interfered with other daily activities?

- Yes, to a high degree
- Yes, to some degree
- No, not at all

LTLBP was defined by answering; Yes, a few days per week or more often in a) AND Yes, to a high degree *OR* Yes, to some degree in b).

## Appendix 2

Construction of the binary lifestyle factor variables incorporated in the exposure variable “healthy lifestyle behaviour” (HLB), based on questions from the baseline questionnaire in 2006 (Health Survey 2006, Stockholm County Council).

### Non-smoking:

26. Do you smoke daily?

1  No

2  Yes

### Recommended level of leisure physical activity:

24. How much have you exercised and exerted yourself physically in *the past 12 months*?

*If your activity for example varies between summer and winter, try to state an average. Indicate one alternative.*

1  Sedentary leisure time

*You spend most of your time reading, watching TV, going to movie theatres or carrying out some other form of sedentary activity. You take walks, cycle or exercise in some other way for less than 2 hours per week.*

2  Moderate leisure time exercise

*You take walks, cycle or exercise in some other way for at least 2 hours per week, usually without sweating. This also includes walks, ordinary garden chores, fishing, table tennis and bowling.*

3  Moderate, regular leisure time exercise

*You exercise regularly 1–2 times per week for at least 30 minutes each time by jogging, swimming, playing tennis, badminton or through another activity that makes you sweat.*

4  Regular leisure time exercise and training

*You, for example, jog, swim, play tennis or badminton or carry out gymnastics or the like and which makes you sweat an average of at least 3 times a week. Each occasion lasts at least 30 minutes..*

25. How many days in **an average week** do you devote to at least 30 minutes of physical activity that makes you grow warm?

*Count fitness training as well as brisk walks, gardening work, heavy household work, cycling, swimming and the like. This may vary during the year, but try to state an average.*

days a week

“Recommended level of leisure physical activity” was theoretically defined as performing leisure physical activity at least 150 minutes at moderate intensity or 75 minutes at high intensity per week or a combination of these activities. This was equal to alternative 4 in question no.24  $OR \geq 5$  days a week



in question no.25 OR a combination of alternative 3 in question no.24 and 3 or 4 days a week in question no.25.

**No risk consumption of alcohol:**

31. What are your alcohol habits during a typical week?

This may vary during the year, but try to state an average. First assess for each day how much you usually drink of the various alcoholic beverages. State in the table what you arrived at in centiliters (cl).

Example:

If you drink as follows:

1 bottle of medium-strong beer for lunch Monday-Thursday (33x4 = 132 cl.).

Tuesday evening, 1 glass of wine (5 cl.).

Wednesday evening, 2 cans of beer (2x50 = 100 cl.).

Friday evening, a half bottle of wine (37 cl.).

Saturday evening, 1 glass of wine (20 cl.) and 1 big cocktail (6 cl. of spirits).

Sunday lunch, 1 shot (3 cl. of spirits) and 1 can of beer (50 cl.).

Then you would fill in the table as follows:

|                 | Spirit                                      | Strong Wine                                 | Wine                                          | Strong Beer                                                          | Beer (Folköl)                                                        | Strong cider/ Alcopop |
|-----------------|---------------------------------------------|---------------------------------------------|-----------------------------------------------|----------------------------------------------------------------------|----------------------------------------------------------------------|-----------------------|
| Monday-Thursday | <input type="text"/>                        | <input type="text"/> 5 <input type="text"/> | <input type="text"/>                          | <input type="text"/> 1 <input type="text"/> 0 <input type="text"/> 0 | <input type="text"/> 1 <input type="text"/> 3 <input type="text"/> 2 | <input type="text"/>  |
| Friday          | <input type="text"/>                        | <input type="text"/>                        | <input type="text"/> 3 <input type="text"/> 7 | <input type="text"/>                                                 | <input type="text"/>                                                 | <input type="text"/>  |
| Saturday        | <input type="text"/> 6 <input type="text"/> | <input type="text"/>                        | <input type="text"/> 2 <input type="text"/> 0 | <input type="text"/>                                                 | <input type="text"/>                                                 | <input type="text"/>  |
| Sunday          | <input type="text"/> 3 <input type="text"/> | <input type="text"/>                        | <input type="text"/>                          | <input type="text"/> 5 <input type="text"/> 0                        | <input type="text"/>                                                 | <input type="text"/>  |

- 1 small shot or cocktail = 3 cl
- 1 cocktail = 6 cl
- 1 glass of wine = 5 cl
- 1 glass of wine = 20 cl
- 1 half-bottle of wine = 37 cl

- 1 bottle of wine = 75 cl
- 1 half-bottle of spirits = 35 cl
- 1 bottle of spirits = 70 cl
- 1 bottle of Alco pop = 27 cl
- 1 bottle/can of beer or strong cider - may contain 33 or 50 cl

For the day(s) you drink an alcoholic beverage, you should indicate in cl., how much you drink. The boxes should only be filled in for the days when you drink a certain alcoholic beverage.

|                 | Spirit               | Wine                 | L.a. Wine            | Beer                 | M.s.beer             | Strong cider/ alcopop |
|-----------------|----------------------|----------------------|----------------------|----------------------|----------------------|-----------------------|
| Monday-Thursday | <input type="text"/>  |
| Friday          | <input type="text"/>  |
| Saturday        | <input type="text"/>  |
| Sunday          | <input type="text"/>  |

Grams of 100% alcohol/week were calculated by summarizing the volume of each of the different alcoholic beverage consumed over the week, multiply this sum with the volume percentage of alcohol

for the specific beverage and finally summarize the volume percentage for all beverages.

As an example from above, the grams of 100% alcohol from strong beer was  $150 \times 0.053$  (volume % in Swedish strong beer) = 7.95 g of 100% alcohol etc.

32. How often do you, on the same occasion, drink alcoholic beverages equivalent to at least:

- A half bottle of spirits
  - or 2 bottles of wine
  - or 6 cans of beer (8 bottles)
  - or 12 bottles of medium-strong beer
- 1  Virtually every day (at least 5 days per week)
- 2  A few times per week (3–4 times per week)
- 3  Once or twice per week
- 4  2–3 times per month
- 5  Once a month
- 6  1–6 times per year
- 7  Never

Using a combination of question no.31 and no.32, “No risk consumption of alcohol” was theoretically defined as drinking;  $\leq 168$  g 100% alcohol/week for men and  $\leq 108$  g 100% alcohol/week for women, AND alternative 6 or 7 on question no.32 (= consuming alcohol corresponding to  $\approx$  half a bottle of spirits on the same occasion less than once a month).

### Recommended consumption of fruit and vegetables:

21. How often do you eat fruits or berries?

*Think of the past 12 months. Count fresh, canned and frozen (for example 1 apple, 1 banana, 1 bunch of grapes, 1 glass of juice, 1 bowl of strawberries or 2 slices of pineapple).*

I eat fruits or berries:

- 1  A few times per month or never      0
- 2  Around once a week      0
- 3  A few times per week      0.5
- 4  Virtually every day      1
- 5  2 times per day      2
- 6  3 or more times per day      3

1  
2  
3 22. How often do you eat a portion of vegetables/root vegetables?

4 *Think of the past 12 months. Count fresh, frozen, canned, stewed in addition to dishes including*  
5 *vegetables (for example ½ bell pepper, 1 tomato, 1–2 dl. shredded carrot, 1–2 dl. mixed vegetables or 1*  
6 *bowl of lentil soup).*

7 *I eat a portion of vegetables/root vegetables:*

- 8  
9  1 A few times per month or never 0  
10  2 Around once a week 0  
11  3 A few times per week 0.5  
12  4 Virtually every day 1  
13  5 2 times per day 2  
14  6 3 or more times per day 3  
15  
16  
17

18 The six answer alternatives on question no.21 and no.22 were assigned a score from 0 to 3.

19  
20 “Recommended consumption of fruit and vegetables” was theoretically defined as having a sum score  
21 from the two questions of  $\geq 4$ . This was equal to eating fruit and vegetables every day and to a  
22  
23 minimum of 4 servings per day ( $\approx 400$  g/day).  
24  
25  
26  
27  
28  
29  
30  
31  
32  
33  
34  
35  
36  
37  
38  
39  
40  
41  
42  
43  
44  
45  
46  
47  
48  
49  
50  
51  
52  
53  
54  
55  
56  
57  
58  
59  
60

1  
2  
3  
4  
5 **Healthy lifestyle behaviour improves the prognosis of low back pain in**  
6  
7 **women: A population-based cohort study.**  
8  
9

10 **Does healthy lifestyle behaviour influence the prognosis of low back pain**  
11 **among men and women in a general population? A population based cohort**  
12 **study.**  
13  
14  
15  
16

17 Tony Bohman, PhD,<sup>1</sup> Lars Alfredsson, professor,<sup>1,2</sup> Irene Jensen, professor,<sup>1</sup> Johan Hallqvist,  
18 professor,<sup>3,4</sup> Eva Vingård, professor,<sup>5</sup> Eva Skillgate, principal,<sup>1,6</sup>  
19  
20

21  
22 <sup>1</sup> Institute of Environmental Medicine, Karolinska Institutet, Box 210, SE-17177 Stockholm, Sweden,  
23

24 <sup>2</sup> Centre for Occupational and Environmental Medicine, Stockholm County Council, Norrbacka, SE-  
25

26 171 76 Stockholm, Sweden, <sup>3</sup> Department of Public Health Sciences, Karolinska  
27

28 Universitetssjukhuset, SE-17176 Stockholm, Sweden, <sup>4</sup> Department of Public Health and Caring  
29

30 Sciences, Uppsala University, Box 564, SE-75122 Uppsala, Sweden, <sup>5</sup> Department of Medical  
31

32 Science, Uppsala University, SE-75185 Uppsala, Sweden, <sup>6</sup> Scandinavian College of Naprapathic  
33

34 Manual Medicine, Kräftriket 23A, SE-11419 Stockholm, Sweden  
35  
36

37  
38 Corresponding author:

39 Tony Bohman, Institute of Environmental Medicine, Karolinska Institutet, Box 210, SE-17177  
40

41 Stockholm, Sweden  
42

43 e-mail; tony.bohman@ki.se, cellphone; +46 70 299 62 63  
44  
45

46  
47 Key words: back pain, epidemiology, life style, cohort studies, public health  
48

49 Word count: 32473392  
50

51 Figures: 3  
52

53 Tables: 2  
54

55 References: 41  
56

57 Supplementary files: 12  
58  
59  
60

1  
2  
3  
4  
5  
6  
7  
8  
9  
10  
11  
12  
13  
14  
15  
16  
17  
18  
19  
20  
21  
22  
23  
24  
25  
26  
27  
28  
29  
30  
31  
32  
33  
34  
35  
36  
37  
38  
39  
40  
41  
42  
43  
44  
45  
46  
47  
48  
49  
50  
51  
52  
53  
54  
55  
56  
57  
58  
59  
60

For peer review only

## Abstract

### Objectives

To study the influence of healthy lifestyle behaviour on the prognosis of occasional low back pain among men and women in a general population.

### Design

Cohort study with a four year follow-up.

### Settings

General population in Stockholm County, Sweden.

### Participants

The study sample comprised 3938 men and 5056 women, aged 18-84, from the Stockholm Public Health cohort reporting occasional low back pain in the baseline questionnaire 2006.

### Measures

Lifestyle factors and potential confounders were assessed at baseline. The lifestyle factors smoking habits, alcohol consumption, leisure physical activity and consumption of fruit and vegetables, were dichotomized using recommendations for a health-enhancing lifestyle and combined to form the exposure variable “healthy lifestyle behaviour”. The exposure was categorised into five levels according to the number of healthy lifestyle factors met. The follow-up questionnaire in 2010 gave information about the outcome, long duration troublesome low back pain. Crude and adjusted binomial regression models were applied to estimate the association between the exposure and the outcome analysing men and women separately.

### Results

The risk of developing long duration troublesome low back pain among women with occasional low back pain decreased with increasing healthy lifestyle behaviour (~~test for trend~~trend test:  $p=0.006$ ). 21% (28/131) among women with no healthy lifestyle factor (reference ~~group~~) experienced the

1  
2  
3 outcome compared to nine percent (36/420) among women with all four factors. Compared to the  
4  
5 reference group, the risk was reduced by 35% (RR: 0.65, 95% CI: 0.44 to 0.96) for women with one  
6  
7 healthy lifestyle factor and 52% (RR: 0.48, 95% CI: 0.31 to 0.77) for women with all four healthy  
8  
9 lifestyle factors. There were no clear associations found among men.

## 11 **Conclusion**

14 Healthy lifestyle behaviour seems to decreases the risk of developing long duration troublesome low  
15  
16 back pain among women with occasional low back pain and may be recommended to improve the  
17  
18 prognosis.  
19

## 22 **Article summary**

### 25 **Strengths and limitations of this study**

- 28 ▪ Strengths of this study are the large sample, the longitudinal design, the long term follow-up,  
29  
30 robust analyses and the large number of potential confounding factors assessed.
- 31  
32 ▪ Possible limitations of this study were the potential risk of misclassification of the exposure  
33  
34 variable and the relatively large loss to follow-up, although these limitations most probably  
35  
36 lead to an underestimation of the associations studied. Further the results may have been  
37  
38 affected by questionnaire items not fully validated.  
39  
40  
41  
42  
43  
44  
45  
46  
47  
48  
49  
50  
51  
52  
53  
54  
55  
56  
57  
58  
59  
60

## Introduction

Lifestyle factors such as non-smoking, physical activity, healthy diet and moderate alcohol use seem to influence the risk and the prognosis in several diseases (e.g. cancer, type 2 diabetes mellitus, and cardiovascular disease) as well as mortality, especially when the factors are combined.[1-5]

Low back pain (LBP) is one of the most common health problems worldwide and comprises a large burden on individuals as well as on society.[6, 7] When estimating the global prevalence of activity-limiting LBP using 165 studies from 54 countries, Hoy and colleagues found the mean point- and 1 month prevalence to be  $11.9 \pm 2.0\%$  and  $23.2 \pm 2.9\%$  respectively.[6] Current knowledge of prognostic factors, e.g. lifestyle factors, for LBP is limited and the above mentioned facts support the need for more research on this topic.

In a “review of reviews” from 2009, Hayden and colleagues reported older age, negative cognitive characteristics, poor general health, increased psychological or psychosocial stress, poor relations with colleagues, physically heavy work, functional disability, sciatica, and the presence of worker’s compensation to be associated with poor outcomes of acute and sub-acute LBP.[8] Another 2009 review found recovery expectations to be associated with activity limitations or participation restrictions (e.g. return to work) in persons with non-chronic non-specific LBP.[9] In the review by Hayden and colleagues smoking was the only lifestyle factor included and found, by two studies, to have no association with poor outcomes of acute and sub-acute LBP.[8] Similarly, a recent review studying prognostic factors for recovery from chronic LBP found no association between smoking and the outcome pain and disability.[10] Moreover, reviewing observational studies on LBP patients Hendrick and colleagues found moderate evidence for sports, leisure and occupational physical activity not to be associated with LBP outcomes.[11]

Women seem to have higher prevalence, be more severely affected and have worse prognosis of LBP than men and some studies suggest that men and women should be assessed separately when studying risk and prognostic factors for LBP.[6, 12-14]

To our knowledge, it is not known if healthy lifestyle behavior, defined by a combination of lifestyle factors, is associated with the prognosis of LBP. Healthy lifestyle behaviour seems to have a larger



1  
2  
3 potential to affect health problems and mortality than separate lifestyle factors alone.[1-5] We  
4  
5 hypothesized that healthy lifestyle behaviour would decrease the risk of a poor outcome among men  
6  
7 and women with occasional low back pain. If healthy lifestyle behaviour affects the prognosis of LBP  
8  
9 implementing this knowledge could potentially prevent transition into disabling LBP and thereby  
10  
11 reduce the burden on the individual as well as on the society.

12  
13 The aim of this study was to explore the influence of healthy lifestyle behaviour on the prognosis of  
14  
15 occasional low back pain among men and women in a general population, hypothesizing that healthy  
16  
17 lifestyle behaviour can improve the prognosis.  
18  
19

## 20 21 **Methods**

### 22 23 **Study design and source population**

24  
25 In this study we used data from the Stockholm Public Health Cohort (SPHC).[15] The SPHC was set  
26  
27 up by the Stockholm County Council and administered by Statistics Sweden and the Department of  
28  
29 Public Health Sciences at Karolinska Institutet, Stockholm. The SPHC is a population based cohort  
30  
31 established within the framework of Stockholm County Council public health surveys. In 2006,  
32  
33 Stockholm County had an adult population of approximately 1.4 million individuals. From this  
34  
35 population a total of 56 634 individuals (18-84 years old) were randomly selected, after stratification  
36  
37 for gender and residential area, and received the baseline questionnaire, which 34 707 (61%)  
38  
39 answered. The responders received a follow-up questionnaire in 2010, answered by 25 167  
40  
41 participants (73%). Compared to consensus data from Stockholm County the SPHC participants were  
42  
43 more likely to be of female gender, be born in Sweden, have higher education and income and be more  
44  
45 than 45 years old.[15]  
46  
47  
48

### 49 50 **Study sample**

51  
52 The study sample (n=8994) consisted of participants reporting occasional LBP at baseline in 2006 who  
53  
54 answered the follow-up questionnaire in 2010 and provided complete information on outcome and  
55  
56 exposure variables (Figure 1). Occasional LBP at baseline was defined as reporting having had LBP,  
57  
58  
59  
60

1  
2  
3 on average, up to a ~~couple of few~~ days per month during the past 6 months ([for the item used to define](#)  
4 [occasional LBP see Appendix 1](#)). The information was based on a modified version of a question from  
5  
6 the Standardized Nordic Questionnaire.[16]  
7  
8

## 9 10 **Data collection and variables**

11  
12 The baseline and the follow-up questionnaires comprised self-reported information on lifestyle,  
13 demographic- and socioeconomic characteristics, physical and psychological health and work related  
14 factors. The self-reported data were supplemented with information from regional and national  
15 registers.[15] Four reminders were sent after the baseline questionnaire and three reminders after the  
16 follow-up questionnaire.  
17  
18  
19  
20  
21

### 22 23 Exposure: healthy lifestyle behaviour (HLB)

24  
25 Using baseline information we constructed four binary healthy lifestyle factors where cut-offs  
26 (healthy/not healthy) were set in accordance with recommendations for a health-enhancing lifestyle  
27 made by Swedish authorities and WHO.[17-20] The exposure variable “healthy lifestyle behaviour”  
28 (HLB) was a combination of these binary factors and was categorised into five levels according to the  
29 number of healthy lifestyle factors included, i.e. from none to four (HLB0 to HLB4). A healthy  
30 lifestyle behaviour with regard to each of the considered healthy factors was defined by: non-smoking,  
31 no risk consumption of alcohol ( $\leq 168$  g 100% alcohol/week for men and  $\leq 108$  g 100% alcohol/week  
32 for women, and consuming alcohol corresponding to about half a bottle of spirits (35 cl) on the same  
33 occasion less than once a month), recommended level of leisure physical activity (at least 150 minutes  
34 at moderate intensity or 75 minutes at high intensity per week or a combination of these activities),  
35 and recommended consumption of fruit and vegetables ( $\geq$  a total of 4 servings of fruit and  
36 vegetables/day, equal to about 400 g/day) (see [the Appendix-Appendix 2](#) for a description of the  
37 questions and how the variables were constructed).  
38  
39  
40  
41  
42  
43  
44  
45  
46  
47  
48  
49  
50  
51

### 52 53 Outcome variable: long duration troublesome low back pain (LTLBP)

54  
55 Information on the outcome LTLBP was collected from the follow-up questionnaire in 2010 and  
56 defined as having had LBP that decreased workability or interfered with other daily activities to some  
57  
58  
59  
60

1  
2  
3 or to high degree, on average a ~~couple of few~~ days per week or more often during the past 6 months  
4 (for the items used to define LTLBP see Appendix 1). The question used to measure LTLBP was  
5  
6 modified from the Standardized Nordic Questionnaire and incorporated a dimension of disability  
7  
8 suggested to be of importance when defining LBP.[16, 21]  
9

## 10 11 Potential confounding factors

12  
13  
14 Potential confounders were chosen based on theoretic and empirical relevance, information from  
15 literature regarding the prognosis of spinal pain and availability in the questionnaire.[8, 22, 23] The  
16 following factors were considered: long-term illness (suffering from long-term illness, health problems  
17 following an accident, disability or other persistent health problems), neck pain and pain from hip,  
18 thigh or knee during the past 6 months (5 answer alternatives from “no pain” to “daily pain”),  
19 suffering from headache or migraine (“no”, “somewhat”, “severe”), rheumatoid arthritis diagnosed by  
20 a physician, living alone, living with children (children of all ages included) and hours of sleep a  
21 typical night during the workweek (dichotomized into “good sleep”: 6-8 h and “poor sleep”: <6 h or  
22 >8 h). The questionnaire also included the 12-item General Health Questionnaire were a sum score of  
23  $\geq 3$  (using the recommended 0-0-1-1 scoring on the four answer alternatives) was used to assess  
24 psychological distress.[24, 25] The frequency of stress was measured by the question “How often do  
25 you feel stress?” with 5 answer alternatives from “never” to “most of the week”. Personal support  
26 (having persons who can give support in handling personal problems or critical life events) was  
27 measured using a question from the Social Support-13 instrument (SS-13).[26] Furthermore, financial  
28 stress was assessed by the question “Did it during the previous 12 months happen that you ran out of  
29 money and had to borrow from relatives and friends to be able to pay for food or rent?” (“no”, “yes, on  
30 one occasion”, “yes, on several occasions”). A Swedish national register supplied information on civil  
31 status (married, unmarried, divorced, widow/widower), country of birth (Sweden, Nordic countries  
32 and Europe, outside Europe), socio-economic status (SES), annual individual disposable income  
33 (grouped in quintiles) and education.[27, 28] The level of education was categorized into, low (only  
34 compulsory education and vocational training), intermediate (secondary school) and high (university  
35 studies).  
36  
37  
38  
39  
40  
41  
42  
43  
44  
45  
46  
47  
48  
49  
50  
51  
52  
53  
54  
55  
56  
57  
58  
59  
60

## Statistical methods

We used generalized linear models with a binomial distribution to estimate the association between the exposure and the outcome analysing men and women separately. To determine the role of a potential confounding factor we included them, one at a time, into the crude model. Only factors that changed the estimated risk ratio (RR) by 10% or more were entered into the final model.[29-33] All final models were adjusted for age categorized into 10 year intervals. Age was categorized as it showed non-linearity with the outcome. We calculated relative risks (RR), using the log function, as well as risk differences (RD), using the identity function, with 95% confidence intervals (95% CI). A likelihood ratio test was used to assess clinically relevant effect measure modification between the exposure and possible confounders (age, education, SES, neck pain, long term illness and psychological distress) as well as between confounders included in the final-adjusted models (age and SES).[34] An effect measure modification significant at  $p \leq 0.05$  was included in further analyses. [34]

We used Wald test to evaluate potential trends in the associations between the exposure and the outcome, and a Chi-square test to assess if the overall adjusted risk differed between men and women.[34] The effect of attrition was assessed, using Chi-square tests, by comparing the distribution of the four healthy lifestyle factors included in the exposure, healthy lifestyle behaviour, in subjects who were lost to follow-up to the distribution in the study sample.

All p-values were two-sided, and analyses were completed using SAS® version 9.3 and STATA/IC® version 12.1.

## Results

### Baseline characteristics

The study sample (n=8994) consisted of 56% women. Participants were predominately middle aged, well educated, and born in Sweden. At baseline in 2006, about 15% of the participants were 65 years or older (men 17% and women 14%). Furthermore the majority were cohabitating, and about 35% had children living at home (Table 1). About three percent men and 10% women had an “optimal healthy lifestyle” (HLB4) whereas about five percent men and three percent women had an “unhealthy

1  
2  
3 lifestyle" (HLB0). Healthy lifestyle behaviour improved with increased level of education.

4  
5 Participants being married or having children living at home had a high proportion of healthy lifestyle  
6  
7 behaviour while participants living alone, being psychologically distressed and financially stressed  
8  
9 showed low proportions of healthy lifestyle behaviour (Table 1).

10  
11 The other baseline variables assessed did not differ much between the categories of HLB, neither  
12  
13 among men nor among women.  
14  
15  
16  
17  
18  
19  
20  
21  
22  
23  
24  
25  
26  
27  
28  
29  
30  
31  
32  
33  
34  
35  
36  
37  
38  
39  
40  
41  
42  
43  
44  
45  
46  
47  
48  
49  
50  
51  
52  
53  
54  
55  
56  
57  
58  
59  
60

For peer review only

Table 1. Baseline characteristics by categories of the exposure healthy lifestyle behaviour (HLB0 - HLB4)\* (n = 8994).

| Baseline characteristics       | Men          |              |              |               |              |              | Women        |              |              |               |               |              | Internal drop-out M/W (n) |
|--------------------------------|--------------|--------------|--------------|---------------|--------------|--------------|--------------|--------------|--------------|---------------|---------------|--------------|---------------------------|
|                                | All (n=3938) | HLB0 (n=181) | HLB1 (n=958) | HLB2 (n=1747) | HLB3 (n=936) | HLB4 (n=116) | All (n=5056) | HLB0 (n=174) | HLB1 (n=897) | HLB2 (n=2080) | HLB3 (n=1416) | HLB4 (n=489) |                           |
| Proportion of study sample (%) | 44           |              |              |               |              |              | 56           |              |              |               |               |              |                           |
| Mean age, years (SD)           | 50(15)       | 49(14)       | 48(15)       | 49(15)        | 51(15)       | 50(14)       | 46(16)       | 43(17)       | 47(15)       | 46(16)        | 47(15)        | 46(14)       | 0/0                       |
| <b>Education</b>               |              |              |              |               |              |              |              |              |              |               |               |              | 234/287                   |
| Low                            | 16           | 30           | 19           | 14            | 14           | 8            | 14           | 22           | 17           | 13            | 12            | 9            |                           |
| Intermediate                   | 43           | 43           | 46           | 44            | 40           | 35           | 41           | 57           | 46           | 42            | 38            | 34           |                           |
| High                           | 41           | 27           | 35           | 42            | 46           | 57           | 45           | 21           | 37           | 45            | 50            | 57           |                           |
| <b>Civil status</b>            |              |              |              |               |              |              |              |              |              |               |               |              | 0/1                       |
| Married                        | 54           | 42           | 49           | 56            | 56           | 65           | 47           | 27           | 41           | 46            | 53            | 53           |                           |
| Unmarried                      | 33           | 38           | 36           | 32            | 31           | 29           | 36           | 49           | 37           | 37            | 33            | 32           |                           |
| Divorced/Widow/Widower         | 13           | 20           | 15           | 12            | 13           | 6            | 17           | 24           | 22           | 17            | 14            | 15           |                           |
| <b>SES<sup>a</sup></b>         |              |              |              |               |              |              |              |              |              |               |               |              | 292/398                   |
| Unskilled/semiskilled worker   | 14           | 22           | 17           | 13            | 12           | 9            | 16           | 23           | 19           | 16            | 14            | 10           |                           |
| Skilled worker                 | 15           | 25           | 16           | 14            | 15           | 8            | 10           | 22           | 12           | 9             | 9             | 11           |                           |
| Assistant non-manual employees | 8            | 8            | 10           | 9             | 7            | 5            | 20           | 22           | 21           | 22            | 18            | 15           |                           |
| Intermediate non-manual        | 25           | 14           | 25           | 24            | 27           | 24           | 29           | 23           | 23           | 29            | 31            | 35           |                           |

1  
2  
3  
4  
5  
6  
7  
8  
9  
10  
11  
12  
13  
14  
15  
16  
17  
18  
19  
20  
21  
22  
23  
24  
25  
26  
27  
28  
29  
30  
31  
32  
33  
34  
35  
36  
37  
38  
39  
40  
41  
42  
43  
44  
45  
46  
47  
48  
49

|                                             |    |    |    |    |    |    |    |    |    |    |    |    |       |
|---------------------------------------------|----|----|----|----|----|----|----|----|----|----|----|----|-------|
| employees                                   |    |    |    |    |    |    |    |    |    |    |    |    |       |
| Employed/self-employed                      | 25 | 17 | 18 | 28 | 28 | 34 | 19 | 7  | 17 | 18 | 21 | 24 |       |
| professionals                               |    |    |    |    |    |    |    |    |    |    |    |    |       |
| Self-employed<br>(other than professionals) | 13 | 14 | 14 | 12 | 11 | 20 | 6  | 3  | 8  | 6  | 7  | 5  |       |
| <b>Poor sleep<sup>b</sup></b>               |    |    |    |    |    |    |    |    |    |    |    |    | 34/27 |
| <6 or >8 hours/night                        | 9  | 17 | 9  | 10 | 7  | 9  | 10 | 14 | 11 | 11 | 9  | 7  |       |
| <b>Living alone</b>                         | 17 | 31 | 19 | 16 | 14 | 9  | 19 | 24 | 21 | 19 | 17 | 17 | 10/16 |
| <b>Living with children</b>                 | 34 | 24 | 31 | 35 | 34 | 42 | 38 | 27 | 32 | 39 | 41 | 41 | 10/16 |
| <b>Psychological distress<sup>c</sup></b>   | 13 | 18 | 15 | 13 | 11 | 5  | 21 | 33 | 23 | 22 | 19 | 17 | 38/37 |
| <b>Financial stress<sup>d</sup></b>         | 7  | 15 | 10 | 5  | 4  | 3  | 9  | 23 | 13 | 9  | 7  | 6  | 17/24 |

\* HLB0 = no healthy lifestyle factor, HLB1 = 1 of 4 healthy lifestyle factors, HLB2 = 2 of 4 factors, HLB3 = 3 of 4 factors, HLB4 = all 4 healthy lifestyle factors.

<sup>a</sup> Socio-economic status. For the economically active population SES was based on current occupation and education. For the non-active population SES was based on previous occupation, current education or the occupation of spouses.

<sup>b</sup> Hours of sleep a typical night during the workweek (dichotomized into “good sleep”: 6-8 h and “poor sleep”: <6 h or >8 h).

<sup>c</sup> From the 12-item General Health Questionnaire (GHQ-12) were a sum score  $\geq 3$  was used to asses psychological stress.

<sup>d</sup> Financial stress: Had to borrow money from relatives and friends to be able to pay for food or rent on several occasions during the previous 12 months.

1  
2  
3 The majority of both men and women were non-smokers and did not exceed risk consumption of  
4 alcohol. About 40% of both men and women reached recommended levels of leisure physical activity  
5 while 26% of the women consumed recommended levels of fruit and vegetables compared to seven  
6 percent for men (Figure 2).  
7  
8  
9

## 10 11 **Outcome**

12  
13  
14 At follow-up in 2010, nine percent men and 11% women in the study sample reported LTLBP. Table  
15  
16 2 shows the crude and adjusted binomial regression estimations of the association between healthy  
17  
18 lifestyle behaviour and the outcome.  
19  
20  
21  
22  
23  
24  
25  
26  
27  
28  
29  
30  
31  
32  
33  
34  
35  
36  
37  
38  
39  
40  
41  
42  
43  
44  
45  
46  
47  
48  
49  
50  
51  
52  
53  
54  
55  
56  
57  
58  
59  
60



Table 2. Association\* between healthy lifestyle behaviour and long duration troublesome low back pain (LTLBP) in men and women with occasional LBP at baseline in 2006.

|             | MEN<br>(n=3646) <sup>a</sup>                   |                                          |                      |                                     |                | WOMEN<br>(n=4658) <sup>a</sup>  |                      |                                     |                |
|-------------|------------------------------------------------|------------------------------------------|----------------------|-------------------------------------|----------------|---------------------------------|----------------------|-------------------------------------|----------------|
|             | Healthy<br>lifestyle<br>behaviour <sup>c</sup> | LTLBP/<br>no LTLBP <sup>d</sup><br>(n/n) | Crude                | Adjusted<br>(Age, SES) <sup>b</sup> |                | LTLBP/<br>no LTLBP <sup>d</sup> | Crude                | Adjusted<br>(Age, SES) <sup>b</sup> |                |
|             |                                                |                                          | RR<br>(95% CI)       | RR<br>(95% CI)                      | RD<br>(95% CI) |                                 | RR<br>(95% CI)       | RR<br>(95% CI)                      | RD<br>(95% CI) |
| <b>HLB0</b> | 14/155                                         | 1.0                                      | 1.0                  | 0.0                                 | 28/131         | 1.0                             | 1.0                  | 0.0                                 |                |
| <b>HLB1</b> | 71/812                                         | 0.97<br>(0.56, 1.68)                     | 1.02<br>(0.59, 1.76) | -0.01<br>(-0.06, 0.03)              | 94/735         | 0.64<br>(0.44, 0.95)            | 0.65<br>(0.44, 0.96) | -0.05<br>(-0.12, 0.01)              |                |
| <b>HLB2</b> | 133/1476                                       | 1.00<br>(0.59, 1.69)                     | 1.05<br>(0.62, 1.78) | -0.01<br>(-0.05, 0.04)              | 181/1721       | 0.54<br>(0.38, 0.78)            | 0.54<br>(0.38, 0.78) | -0.07<br>(-0.13, -0.01)             |                |
| <b>HLB3</b> | 60/818                                         | 0.82                                     | 0.85                 | -0.02                               | 125/1187       | 0.54                            | 0.55                 | -0.07                               |                |

|             |       |              |              |               |        |              |              |                |
|-------------|-------|--------------|--------------|---------------|--------|--------------|--------------|----------------|
|             |       | (0.47, 1.44) | (0.48, 1.48) | (-0.06, 0.02) |        | (0.37, 0.79) | (0.38, 0.81) | (-0.13, -0.01) |
| <b>HLB4</b> | 6/101 | 0.68         | 0.75         | -0.03         | 36/420 | 0.45         | 0.48         | -0.08          |
|             |       | (0.27, 1.71) | (0.30, 1.89) | (-0.07, 0.01) |        | (0.28, 0.71) | (0.31, 0.77) | (-0.15, -0.02) |

\*note: Log- binomial regression estimating the risk ratio (RR) and the risk difference (RD) with 95% confidence interval (95% CI).

<sup>a</sup> Reduced number of observations due to missing information about socio-economic status (SES) (men n=292 and women n=398).

<sup>b</sup> Adjusted for age in 10 year categories and socio-economic status (SES) in six categories.

<sup>c</sup> HLB0 = no healthy lifestyle factor, HLB1 = 1 of 4 healthy lifestyle factors, HLB2 = 2 of 4 factors, HLB3 = 3 of 4 factors, HLB4 = all 4 healthy lifestyle factors.

Healthy lifestyle factors included in HLB: non-smoking, no risk consumption of alcohol ( $\leq 168$  g 100% alcohol/week for men and  $\leq 108$  g 100% alcohol/week for women, and consuming alcohol corresponding to  $\approx$  half a bottle of spirits on the same occasion less than once a month), recommended level of leisure physical activity (at least 150 minutes at moderate intensity or 75 minutes at high intensity per week or a combination of these activities), and recommended consumption of fruit and vegetables ( $\geq 4$  servings of fruit and vegetables/day).

<sup>d</sup> Numbers of participants with and without LTLBP at follow-up in 2010.

1  
2  
3 There was a decreased risk for LTLBP at follow-up for women with a healthy lifestyle behaviour  
4 compared to women with unhealthy lifestyle behaviour (test for trend:  $p=0.006$ ). Twenty-one percent  
5 of women with no healthy lifestyle factor (HLB0) experienced LTLBP at follow-up compared to nine  
6  
7 percent of women with all four factors (HLB4). A five percent lower proportion of women with one  
8  
9 healthy lifestyle factor, and an eight percent lower proportion of women with all four factors had  
10  
11 LTLBP, in comparison to the reference group (HLB0). Women with one healthy lifestyle factor and  
12  
13 women with all four healthy lifestyle factors had a 35% and a 52% lower risk for LTLBP,  
14  
15 respectively, compared to women with unhealthy lifestyle behaviour (HLB0). There were no clear  
16  
17 associations between healthy lifestyle behaviour and LTLBP found among men.  
18  
19

20  
21 SES was the only variable found to be a confounder, so the final log-binomial analyses were adjusted  
22  
23 by SES and age in 10 year categories. There was no **clinically relevant** effect measure modifications  
24  
25 found.  
26  
27

28 Figure 3 shows the adjusted risk to develop LTLBP for men and women with occasional LBP by  
29  
30 categories of healthy lifestyle behaviour. Women had an overall higher adjusted risk for LTLBP than  
31  
32 men ( $p=0.001$ ).  
33  
34

35 The subjects lost to follow-up ( $n=4552$ ) had significantly lower proportions of healthy lifestyle factors  
36  
37 than the study sample ( $p < 0.01$  for all four factors). The differences in proportions were eight percent  
38  
39 for non-smoking, 16% for no risk consumption of alcohol, six percent for leisure physical activity and  
40  
41 five percent for consumption of fruit and vegetables.  
42  
43  
44

## 45 Discussion

46  
47 In this cohort study we found that healthy lifestyle behaviour had a positive influence on the prognosis  
48  
49 of occasional low back pain among women. Healthy lifestyle behaviour comprised four healthy  
50  
51 lifestyle factors: non-smoking, no risk consumption of alcohol, recommended level of leisure physical  
52  
53 activity and recommended consumption of fruit and vegetables. Compared to women with no healthy  
54  
55 lifestyle factor, the risk for development of long duration troublesome low back pain (LTLBP)  
56  
57 decreased by 35% among women with one healthy lifestyle factor and by 52% among women with all  
58  
59  
60

1  
2  
3 four healthy lifestyle factors. In absolute terms, the proportion of women with LTLBP at follow-up  
4 was five percent lower if they had one healthy lifestyle factor and eight percent lower if they had four  
5 healthy lifestyle factors when compared to women with unhealthy lifestyle behaviour. These  
6 associations were not confirmed among men but the results indicated the same tendency.  
7  
8  
9

10  
11 Further, compared to women, men had an overall lower adjusted risk for LTLBP, and a low risk even  
12 in the unhealthy reference group (Figure 3). Men with unhealthy lifestyle behaviour had about the  
13 same risk for LTLBP as women with optimal healthy lifestyle behaviour. These findings were not  
14 aimed to be addressed in the present study and needs to be further investigated.  
15  
16  
17  
18

19  
20 We found no studies concerning the effects of healthy lifestyle behaviour, defined as a combination of  
21 healthy lifestyle factors, on the prognosis of LBP or other types of spinal pain. Nevertheless,  
22 considering the risk of developing chronic back pain Pronk and colleagues showed results in line with  
23 our study.[2] Studying employees, the authors found that an “optimal lifestyle” decreased the 2-year  
24 risk of chronic LBP by 66% compared to employees with an unhealthy lifestyle. Having optimal  
25 lifestyle was equal to having all four of the healthy lifestyle factors similar to the ones included in our  
26 study: non-smoking, adequate physical activity, five servings of fruit and vegetables per day and  
27 limited or no alcohol consumption.  
28  
29  
30  
31  
32  
33  
34  
35  
36  
37

### 38 **Strengths and limitations**

39  
40 To our knowledge this is the first study concerning the influence of healthy lifestyle behaviour (HLB)  
41 on the prognosis of LBP assessing men and women separately. Measuring the exposure prior to the  
42 outcome and the dose-response relationship found supports the validity of the associations between  
43 HLB and LTLBP found among women.[32] We believe the use of a complete study sample, the large  
44 sample size and the large number of potential confounders assessed strengthens the internal validity,  
45 though we cannot rule out residual or unmeasured confounding. [for example information on health](#)  
46 [care services](#). [32] The questions used in this study have, since 1975, been used in several Swedish  
47 national and local public health surveys. They have on several occasions been tested (e.g. cognitive  
48 testing) and improved by Statistics Sweden’s test centre and several questions have shown to have  
49  
50  
51  
52  
53  
54  
55  
56  
57  
58  
59  
60

1  
2  
3 acceptable psychometric properties. Moreover, information on education, disposable income, SES,  
4 country of birth and marital status were collected from Swedish national registers known to have high  
5 quality. The questions concerning leisure physical activity and consumption of fruit and vegetables  
6  
7 have shown to have acceptable validity and reliability, and the method to measure alcohol  
8  
9 consumption has been recommended by Romelsjö and colleagues.[35-38] Despite this the  
10  
11 measurements used may not have been optimal in terms of validity and reliability.  
12  
13

14  
15 Our study also has limitations. Self-reported exposure information may be hampered by low accuracy.  
16  
17 For example, some participants may wish to present themselves in a favourable light and overestimate  
18 their healthy lifestyle (social desirability) or some may have difficulties understanding the questions  
19 and therefore report less well.[32, 39, 40] This could lead to misclassification of the exposure which  
20 may result in an under- or overestimation of the association. As this potential misclassification is  
21 likely to be non-differential it would probably dilute a true association, at least when comparing  
22 extremes.[32] Moreover, if men tend to misclassify their healthy lifestyle factors to a greater extent  
23 than women this may partly explain why we did not find any associations among men. For example,  
24 Dyrstad and colleagues found that men overestimated their self-reported physical activity when  
25 compared to accelerometer-measures to a greater extent than women.[41] As we studied a population  
26 between 18-84 years old a large proportion of the participants did not provide work related  
27 information why we did not assess potential confounding effects from work related variables,  
28 something that may have affected the results. About 34% of participants in the baseline survey were  
29 not part of the study sample due to attrition and exclusion (Figure 1). Compared to the study sample  
30 the 34% missing had the same proportion of men and women, were younger (mean age for both sexes  
31 were 43 years) and both men and women had a slightly lower level of education as well as SES.  
32 Further, they had ~~These subjects had~~ significantly lower proportions of healthy lifestyle factors than  
33 the study sample. This difference may have introduced selection ~~biased to~~ our results if the attrition  
34 and the loss to follow-up are related to the exposure as well as to the outcome. If selection bias is  
35 present, we believe that it probably leads ~~most probably leading~~ to an underestimation of the  
36 associations since these subjects to a higher extent may have developed LTLBP.  
37  
38  
39  
40  
41  
42  
43  
44  
45  
46  
47  
48  
49  
50  
51  
52  
53  
54  
55  
56  
57  
58  
59  
60

1  
2  
3 Considering strengths and limitations in our study we regard our result as a valid contribution to the  
4 body of research showing that a healthy lifestyle affects health problems.[1-5] Our study results  
5 showing that healthy lifestyle behaviour influences the prognosis of LBP are new and important  
6 knowledge with the potential to have an impact on a very common public health problem and have  
7 implications both in a public-health and a clinical perspective. Even though the association for healthy  
8 lifestyle behaviour to affect LBP among men was not clear, the results showed the same tendency as  
9 for women. Considering this together with the obvious effect of healthy lifestyle on other health  
10 problems the work to encourage both men and women to adapt to healthy lifestyle should certainly be  
11 continued.  
12  
13  
14  
15  
16  
17  
18  
19  
20  
21  
22

## 23 Conclusion

24  
25 Healthy lifestyle behaviour, defined as combinations of non-smoking, no risk consumption of alcohol,  
26 recommended level of leisure physical activity and recommended consumption of fruit and vegetables,  
27 seems to decreases the risk of developing long duration troublesome low back pain among women  
28 with occasional low back pain. There were no clear associations found among men.  
29  
30  
31  
32  
33  
34  
35  
36

37 **Contributors:** TB, ES, LA, EV and IJ contributed to the design of the study. JH and LA were part of  
38 the expert group responsible for the design and implementation of the SPHC cohort. TB made the  
39 statistical analyses and wrote the first manuscript version. All authors contributed to the interpretation  
40 of the data and critically revised all versions of the manuscript and finally approved the last version.  
41  
42  
43  
44

45 **Acknowledgements:** We would like to thank professor Matteo Bottai at the Institute of  
46 Environmental Medicine, Karolinska Institutet, for advice regarding the statistical analyses, and  
47 assistant professor Jill Hayden at the Faculty of Medicine, Dalhousie University, for valuable  
48 comments on the manuscript.  
49  
50  
51  
52  
53

54 **Funding:** The Stockholm County Council provided the financial support to form The Stockholm  
55 Public Health Cohort. TB had his salary provided by The Health Care Sciences Postgraduate School at  
56  
57  
58  
59  
60

1  
2  
3 Karolinska Institutet, Stockholm, Sweden. ES was financially supported by the AFA Insurance  
4 postdoc scholarship. Funders had no role in the collection, analyses or interpretation of the data, or in  
5 the writing of the article.  
6  
7

8  
9  
10 **Competing interests:** None declared.

11  
12 **Ethical approval:** The regional ethical review board in Stockholm, Sweden, approved the study  
13 (Diary nr. 2013/497-32).  
14

15  
16 **Data sharing:** No additional data available.

17  
18  
19 **Transparency:** The lead author (TB) affirms that the manuscript is an honest, accurate, and  
20 transparent account of the study being reported; that no important aspects of the study have been  
21 omitted; and that any discrepancies from the study as planned have been explained.  
22  
23  
24

## 25 26 27 28 **References**

- 29  
30 1. Ford ES, Bergman M. Healthy Living Is Best Revenge; Findings From the European  
31 Prospective Investigation Into Cancer and Nutrition - Postdam Study. Arch Intern Med  
32 2009;169(15):1355-62.  
33
- 34 2. Pronk NP, Lowry M, Kottke TE, *et al.* The association between optimal lifestyle adherence and  
35 short-term incidence of chronic conditions among employees. Popul Health Manag  
36 2010;13(6):289-95.  
37
- 38 3. Towfighi A, Markovic D, Ovbiagele B. Impact of a healthy lifestyle on all-cause and  
39 cardiovascular mortality after stroke in the USA. J Neurol Neurosurg Psychiatry  
40 2012;83(2):146-51.  
41
- 42 4. Ford ES, Bergmann MM, Boeing H, *et al.* Healthy lifestyle behaviors and all-cause mortality  
43 among adults in the United States. Prev Med 2012;55(1):23-7.  
44
- 45 5. Chow CK, Jolly S, Rao-Melacini P, *et al.* Association of diet, exercise, and smoking  
46 modification with risk of early cardiovascular events after acute coronary syndromes.  
47 Circulation 2010;121(6):750-8.  
48  
49  
50  
51  
52  
53  
54  
55  
56  
57  
58  
59  
60

- 1  
2  
3 6. Hoy D, Bain C, Williams G, *et al*. A systematic review of the global prevalence of low back  
4 pain. *Arthritis Rheum* 2012;64(6):2028-37.
- 5  
6  
7 7. Hoy D, Brooks P, Blyth F, *et al*. The Epidemiology of low back pain. *Best Pract Res Clin*  
8  
9  
10  
11  
12  
13  
14  
15  
16  
17  
18  
19  
20  
21  
22  
23  
24  
25  
26  
27  
28  
29  
30  
31  
32  
33  
34  
35  
36  
37  
38  
39  
40  
41  
42  
43  
44  
45  
46  
47  
48  
49  
50  
51  
52  
53  
54  
55  
56  
57  
58  
59  
60  
16. 9. Iles RA, Davidson M, Taylor NF, *et al*. Systematic review of the ability of recovery  
expectations to predict outcomes in non-chronic non-specific low back pain. *J Occup Rehabil*  
2009;19(1):25-40.
10. Verkerk K, Luijsterburg PA, Miedema HS, *et al*. Prognostic factors for recovery in chronic  
nonspecific low back pain: a systematic review. *Phys Ther* 2012;92(9):1093-108.
11. Hendrick P, Milosavljevic S, Hale L, *et al*. The relationship between physical activity and low  
back pain outcomes: a systematic review of observational studies. *Eur Spine J* 2011;20(3):464-  
74.
12. Messing K, Stock SR, Tissot F. Should studies of risk factors for musculoskeletal disorders be  
stratified by gender? Lessons from the 1998 Quebec Health and Social Survey. *Scand J Work*  
*Environ Health* 2009;35(2):96-112.
13. Chenot JF, Becker A, Leonhardt C, *et al*. Sex differences in presentation, course, and  
management of low back pain in primary care. *Clin J Pain* 2008;24(7):578-84.
14. Bohman T, Alfredsson L, Hallqvist J, *et al*. The influence of self-reported leisure time physical  
activity and the body mass index on recovery from persistent back pain among men and women:  
a population-based cohort study. *BMC Public Health* 2013;13(1):385.
15. Svensson AC, Fredlund P, Laflamme L, *et al*. Cohort Profile: The Stockholm Public Health  
Cohort. *Int J Epidemiol* 2013;42(5):1263-72.
16. Kuorinka I, Jonsson B, Kilbom A, *et al*. Standardised Nordic questionnaires for the analysis of  
musculoskeletal symptoms. *Appl Ergon* 1987;18(3):233-7.



- 1  
2  
3 17. The National Board of Health and Welfare (Socialstyrelsen). Nationella riktlinjer för  
4 sjukdomsförebyggande metoder 2011 – stöd för styrning och ledning (National guidelines for  
5 disease prevention methods 2011). Stockholm, Sweden 2011; 16-17,  
6  
7  
8  
9 | www.socialstyrelsen.se/publikationer2011/2011-11-11 (accessed ~~May-Oct~~ 2014).
- 10  
11 18. World Health Organisation (WHO). Diet, nutrition and the prevention of chronic diseases,  
12 Report of the joint WHO/FAO expert consultation. WHO Technical Report Series No. 916.  
13 Geneva, Switzerland 2003. www.who.int/dietphysicalactivity/publications/trs916/en/ (accessed  
14  
15 ~~Oct-May~~ 2014).
- 16  
17  
18  
19 19. World Health Organisation (WHO). Global recommendations on physical activity for health.  
20 Geneva, Switzerland 2010. www.who.int/dietphysicalactivity/factsheet\_recommendations/en/  
21  
22 (accessed ~~Oct-May~~ 2014).
- 23  
24  
25 20. Andreasson S, Allebeck P. Alkohol och Hälsa. Swedish National Institute of Public Health  
26 (Statens Folkhälsoinstitut) r 2005:11. Stockholm, Sweden,  
27  
28  
29 www.folkhalsomyndigheten.se/publicerat-material/publikationer/Alkohol-och-halsa/ (accessed  
30  
31 ~~Oct-May~~ 2014).
- 32  
33 21. Dionne CE, Dunn KM, Croft PR, *et al.* A consensus approach toward the standardization of  
34 back pain definitions for use in prevalence studies. Spine (Phila Pa 1976) 2008;33(1):95-103.
- 35  
36  
37 22. Palmlof L, Skillgate E, Alfredsson L, *et al.* Does income matter for troublesome neck pain? A  
38 population-based study on risk and prognosis. J Epidemiol Community Health  
39  
40 2012;66(11):1063-70.
- 41  
42  
43 23. Carroll LJ, Hogg-Johnson S, van der Velde G, *et al.* Course and prognostic factors for neck pain  
44 in the general population: results of the Bone and Joint Decade 2000-2010 Task Force on Neck  
45 Pain and Its Associated Disorders. Spine 2008;33(4 Suppl):S75-82.
- 46  
47  
48 24. McDowell I. Measuring health a guide to rating scales and questionnaires. 3rd ed. Oxford  
49 University Press, 2006.
- 50  
51  
52  
53 25. Goldberg DP, Gater R, Sartorius N, *et al.* The validity of two versions of the GHQ in the WHO  
54 study of mental illness in general health care. Psychol Med 1997;27(1):191-7.
- 55  
56  
57  
58  
59  
60

- 1  
2  
3 26. Unden AL, Orth-Gomer K. Development of a social support instrument for use in population  
4 surveys. *Soc Sci Med* 1989;29(12):1387-92.  
5  
6  
7 27. Statistics Sweden. Socioekonomisk indelning (SEI) (Socio-economic classification system). In:  
8 Fastbom L. Meddelanden i samordningsfrågor för Sveriges officiella statistik (MIS), rep No.  
9 1982:4:6-8. Stockholm, 1984. [www.scb.se/sv/\\_/Hitta-statistik/Publiceringskalender/Visa-  
11 detaljerad-information/?PublObjId=6607](http://www.scb.se/sv/_/Hitta-statistik/Publiceringskalender/Visa-<br/>10 detaljerad-information/?PublObjId=6607) (accessed ~~Oct~~ ~~May~~ 2014).  
12  
13  
14  
15 28. Statistics Sweden. Longitudinal Intergration data base for health insurance - and laubormarket  
16 studies (LISA). Secondary Longitudinal Intergration data base for health insurance - and  
17 laubormarket studies (LISA), 2009. [www.scb.se/lisa/](http://www.scb.se/lisa/) (accessed ~~May~~ ~~Oct~~ 2014).  
18  
19  
20  
21 29. Carroll LJ, Hurwitz EL, Cote P, *et al.* Research priorities and methodological implications: the  
22 Bone and Joint Decade 2000-2010 Task Force on Neck Pain and Its Associated Disorders.  
23 *Spine* 2008;33(4 Suppl):S214-20.  
24  
25  
26  
27 30. Kurth T, Sonis J. Assessment and control of confounding in trauma research. *J Trauma Stress*  
28 2007;20(5):807-20.  
29  
30  
31 31. Tong IS, Lu Y. Identification of confounders in the assessment of the relationship between lead  
32 exposure and child development. *Ann Epidemiol* 2001;11(1):38-45.  
33  
34  
35 32. Rothman KJ, Greenland S, Lash TL. *Modern epidemiology*. 3rd ed. Wolters Kluwer  
36 Health/Lippincott Williams & Wilkins, 2008.  
37  
38  
39 33. Mickey RM, Greenland S. The impact of confounder selection criteria on effect estimation. *Am*  
40 *J Epidemiol* 1989;129(1):125-37.  
41  
42  
43 34. Hosmer DW, Lemeshow S. *Applied logistic regression*. 2nd ed. Wiley, 2000.  
44  
45  
46 35. Orsini N, Bellocco R, Bottai M, *et al.* Validity of self-reported total physical activity  
47 questionnaire among older women. *Eur J Epidemiol* 2008;23(10):661-7.  
48  
49  
50 36. Romelsjo A, Leifman H, Nystrom S. A comparative study of two methods for the measurement  
51 of alcohol consumption in the general population. *Int J Epidemiol* 1995;24(5):929-36.  
52  
53  
54 37. Sepp H, Ekelund U, Becker W. Enkätfrågor om kost och fysisk aktivitet bland vuxna -  
55 Underlag till urval av frågor i befolkningsinriktade enkäter. Swedish National Food  
56 Administration, rep No. 21, 2004. [www.slv.se/sv/grupp1/Mat-och-naring/Matvanor---](http://www.slv.se/sv/grupp1/Mat-och-naring/Matvanor---)  
57  
58  
59  
60

undersokningar/Hur-undersoks-matvanor/Validerade-enkatfragor-om-kost-och-fysisk-aktivitet/  
(accessed ~~May~~Oct 2014).

38. Ekelund U, Sepp H, Brage S, *et al.* Criterion-related validity of the last 7-day, short form of the International Physical Activity Questionnaire in Swedish adults. *Public Health Nutrition* 2006;9(02):258-65.
39. Connor Gorber S, Schofield-Hurwitz S, Hardt J, *et al.* The accuracy of self-reported smoking: a systematic review of the relationship between self-reported and cotinine-assessed smoking status. *Nicotine Tob Res* 2009;11(1):12-24
40. Ainsworth BE, Levy SS. Methodological issues. In: Oja P, Borms J. Health enhancing physical activity. Meyer & Meyer Sport, 2004.
41. Dyrstad SM, Hansen BH, Holme IM, *et al.* Comparison of self-reported versus accelerometer-measured physical activity. *Med Sci Sports Exerc* 2014;46(1):99-106.

Figure 1. Flowchart of the inclusion process for the study sample. LBP: low back pain.

Figure 2. Distribution of healthy lifestyle factors. PA: Leisure physical activity. F/V: Fruit and vegetables.

Figure 3. Estimated risk for LTLBP, adjusted for SES and age. Men (n=3646), women (n=4658).
