# Supplementary material for: Does a healthy lifestyle behaviour influence the prognosis of low back pain among men and women in a general population? A population-based cohort study
Source: HighWire-hosted journal article supplement (doi:10.1136/bmjopen-2014-005713), 2014-12-01
Supplement: bmjopen-2014-005713supp_appendix1.pdf [file bmjopen-2014-005713supp_appendix1.pdf]

## Appendix 1

Item in the baseline questionnaire in 2006 used to define individuals with occasional low back pain forming the study sample:

Have you had any pain in your lower back in the past 6 months?

If you have experienced pain on several occasions, try to estimate an average and put an X in the most appropriate box.

1.  No
2.  Yes, a few days in the past six months
3.  Yes, a few days per month
4.  Yes, a few days per week
5.  Yes, every day

Included in the study sample were individuals answering; Yes, a few days in the past six months *OR* Yes, a few days per month.

Items in the follow-up questionnaire in 2010 used to define the outcome long duration troublesome low back pain (LTLBP):

a) Have you had pain in your lower back in the past 6 months?

If you have experienced pain on several occasions, try to estimate an average and put an X in the most appropriate box.

- No
- Yes, a few days per month or more seldom
- Yes, a few days per week or more often

*If Yes;*

b) Have these problems decreased your workability or interfered with other daily activities?

- Yes, to a high degree
- Yes, to some degree
- No, not at all

LTLBP was defined by answering; Yes, a few days per week or more often in a) AND Yes, to a high degree *OR* Yes, to some degree in b).
